# Supplementary material for: Quaternary ammonium fluorides and difluorosilicates as nucleophilic fluorination reagents
Source: Royal Society of Chemistry journal article supplement (doi:10.1039/d3ob01875j), 2023-12-25
Supplement: d3ob01875j1.pdf [file d3ob01875j1.pdf]

# Quaternary ammonium fluorides and difluorosilicates as nucleophilic fluorination reagents.

Michal Trojan,<sup>a</sup> Kateřina Kučnirová,<sup>a</sup> Šárka Bouzková,<sup>a</sup> Josef Cvačka,<sup>b</sup> Jan Čejka,<sup>c</sup> Gašper Tavčar,<sup>d</sup>  
Markéta Rybáčková<sup>a</sup> and Jaroslav Kvíčala<sup>\*a</sup>

<sup>a</sup> Department of Organic Chemistry, University of Chemistry and Technology, Prague, Technická 5, 166 28 Prague 6, Czech Republic.

<sup>b</sup> Institute of Organic Chemistry and Biochemistry of the Czech Academy of Sciences, Flemingovo náměstí 542/2, 160 00 Prague 6, Czech Republic.

<sup>c</sup> Department of Solid State Chemistry, University of Chemistry and Technology, Prague, Technická 5, 166 28 Prague 6, Czech Republic.

<sup>d</sup> Department of Inorganic Chemistry and Technology, "Jožef Stefan" Institute, Jamova cesta 39, Ljubljana, Slovenia.

\* Corresponding author. E-mail address: kvicalaj@vscht.cz (Jaroslav Kvíčala)

## SUPPORTING INFORMATION

### Table of Contents

|                                                               |    |
|---------------------------------------------------------------|----|
| 1. Results of preliminary computations.....                   | 1  |
| 2. NMR spectra of the synthesized compounds .....             | 2  |
| 3. Crystallographic data of 13b.....                          | 21 |
| 4. XYZ files of computed structures (energies in kJ/mol)..... | 22 |
| 5. References.....                                            | 44 |

#### 1. Results of preliminary computations

Preliminary computations were performed using Gaussian16<sup>1</sup> program suite using pure M-06L functional,<sup>2</sup> which enabled the use of the RI (resolution of identity) approach,<sup>3</sup> together with the double- $\zeta$  def2-SVP basis set,<sup>4</sup> which greatly accelerated the initial calculations. To better describe the anionic structures, we also used double- $\zeta$  def2-SVPD basis set with additional diffuse functions.<sup>5</sup> Solvent (MeCN) was simulated using the SMD variant of the IEF-PCM method.<sup>6</sup> The potential energy surfaces of decomposition of difluorosilicates **20-23** to fluorosilane-ammonium fluoride complexes **24-27** is show on Figure S1. Compared to higher level computations at the M06-2X/def2-TZVP level, relative transition state energies was lower for silicate **22**, but decrease analogously with increasing amount of methyl groups in the silicate.

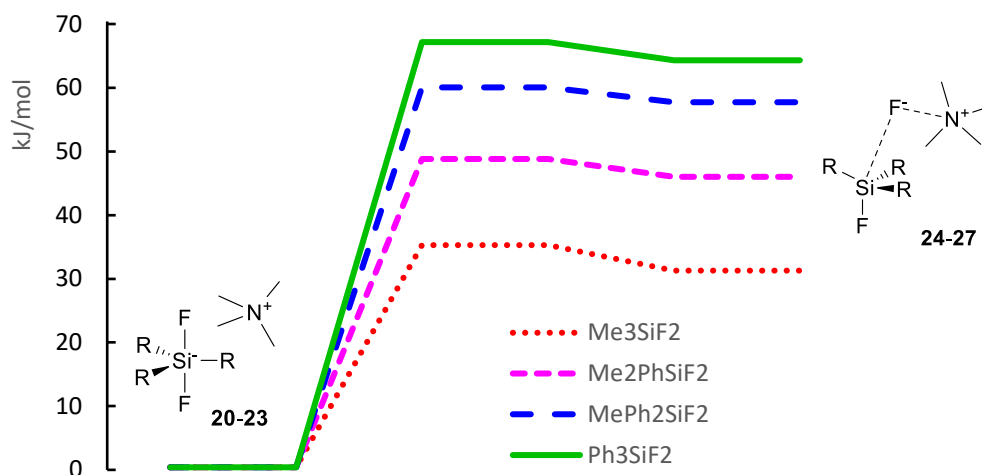

**Figure S1.** Preliminary calculations of potential energy surfaces of decomposition of difluorosilicates **20-23** to fluorosilane-ammonium fluoride complexes **24-27** at the SMD-M06L/def2-SVP level of theory

## 2. NMR spectra of the synthesized compounds

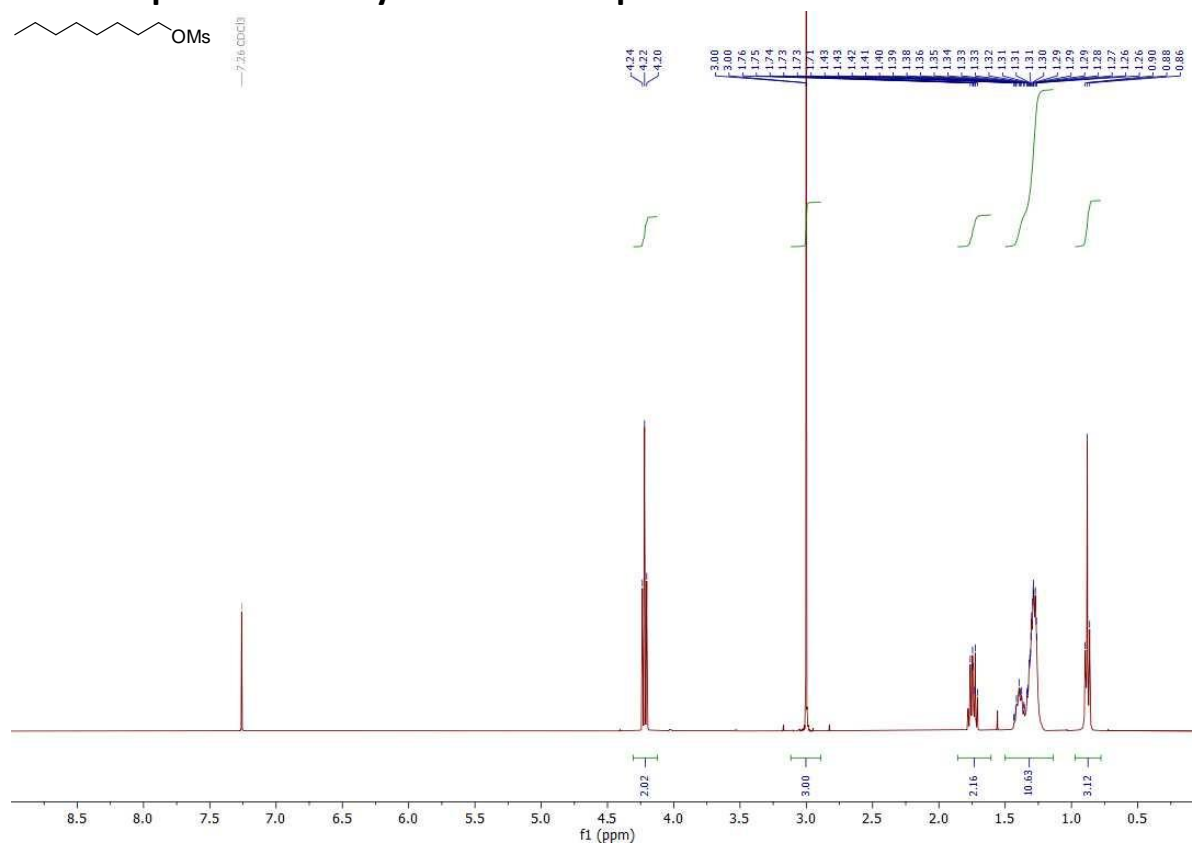

**Figure S1:** <sup>1</sup>H NMR spectrum of **4a** in CDCl<sub>3</sub>



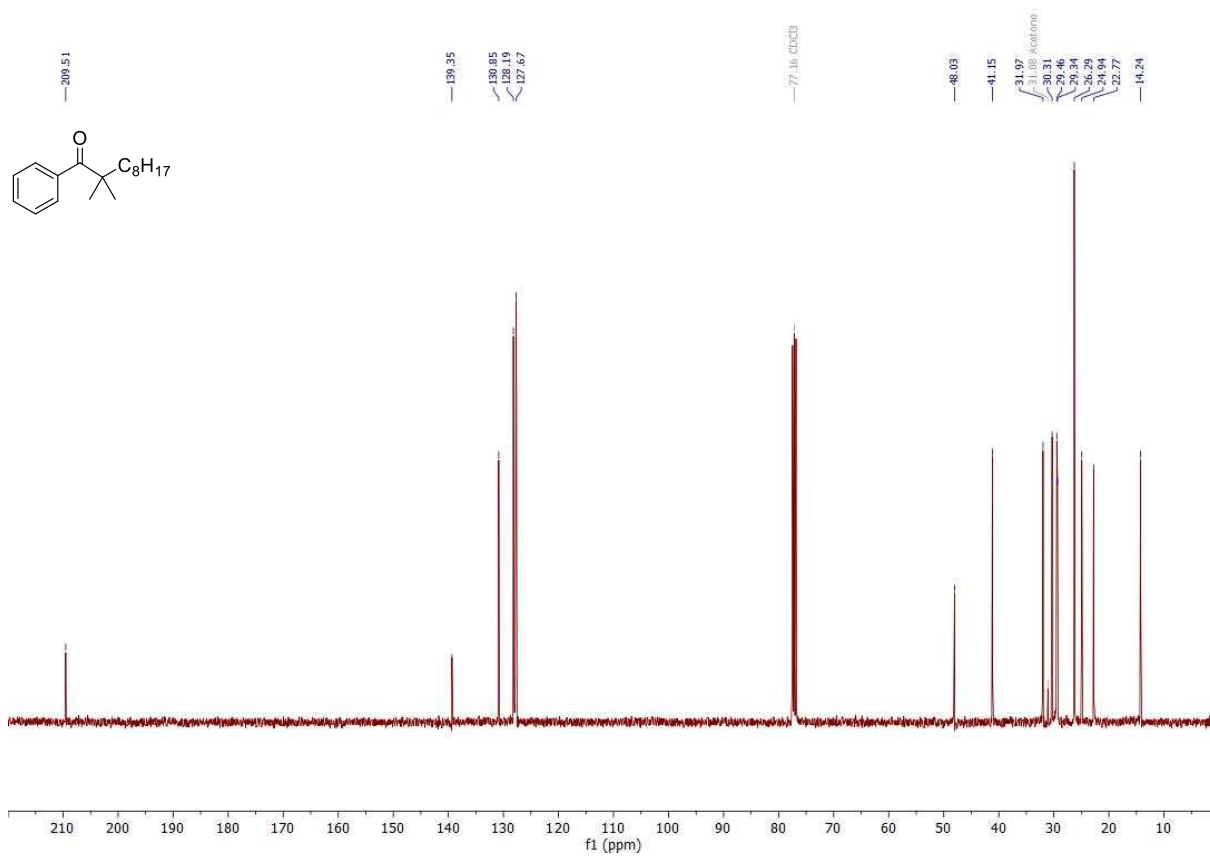

Figure S4:  $^{13}\text{C}$  NMR spectrum of **11** in  $\text{CDCl}_3$

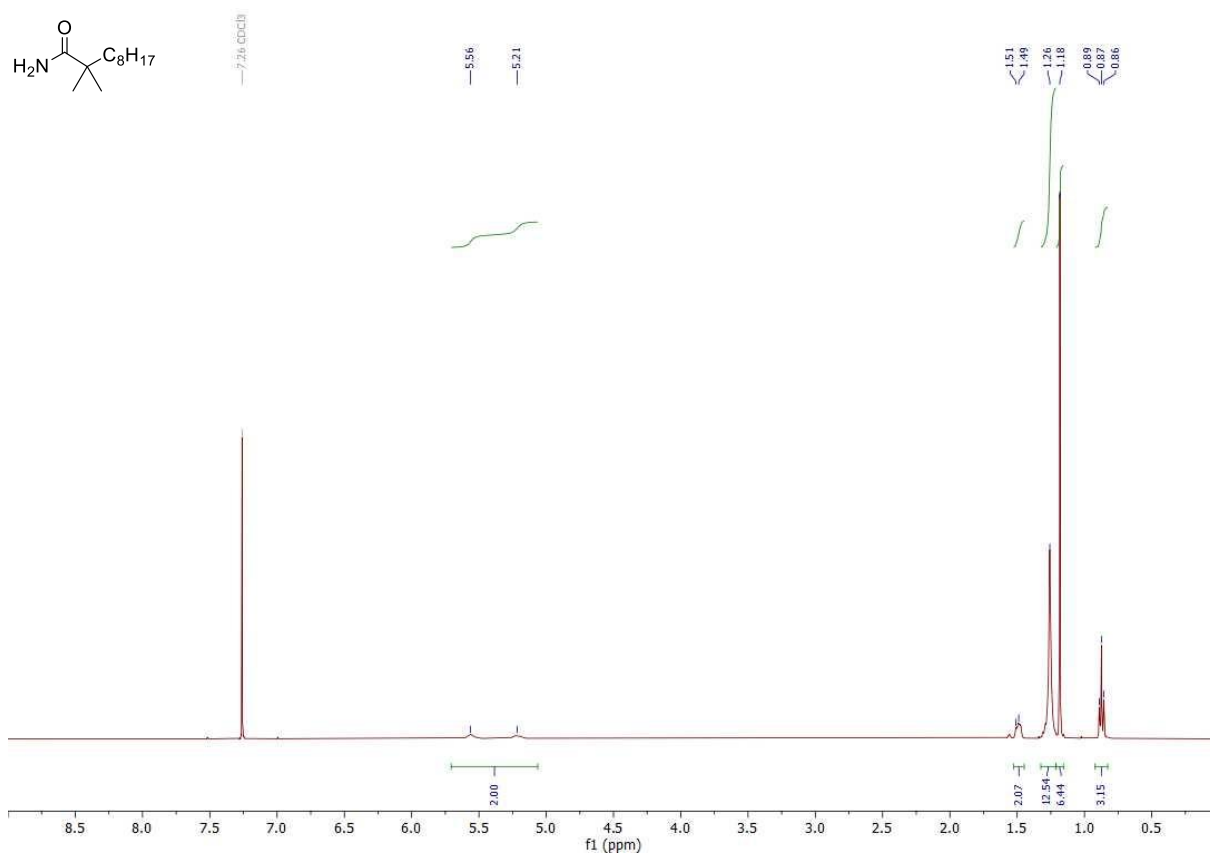

Figure S5:  $^1\text{H}$  NMR spectrum of **12** in  $\text{CDCl}_3$

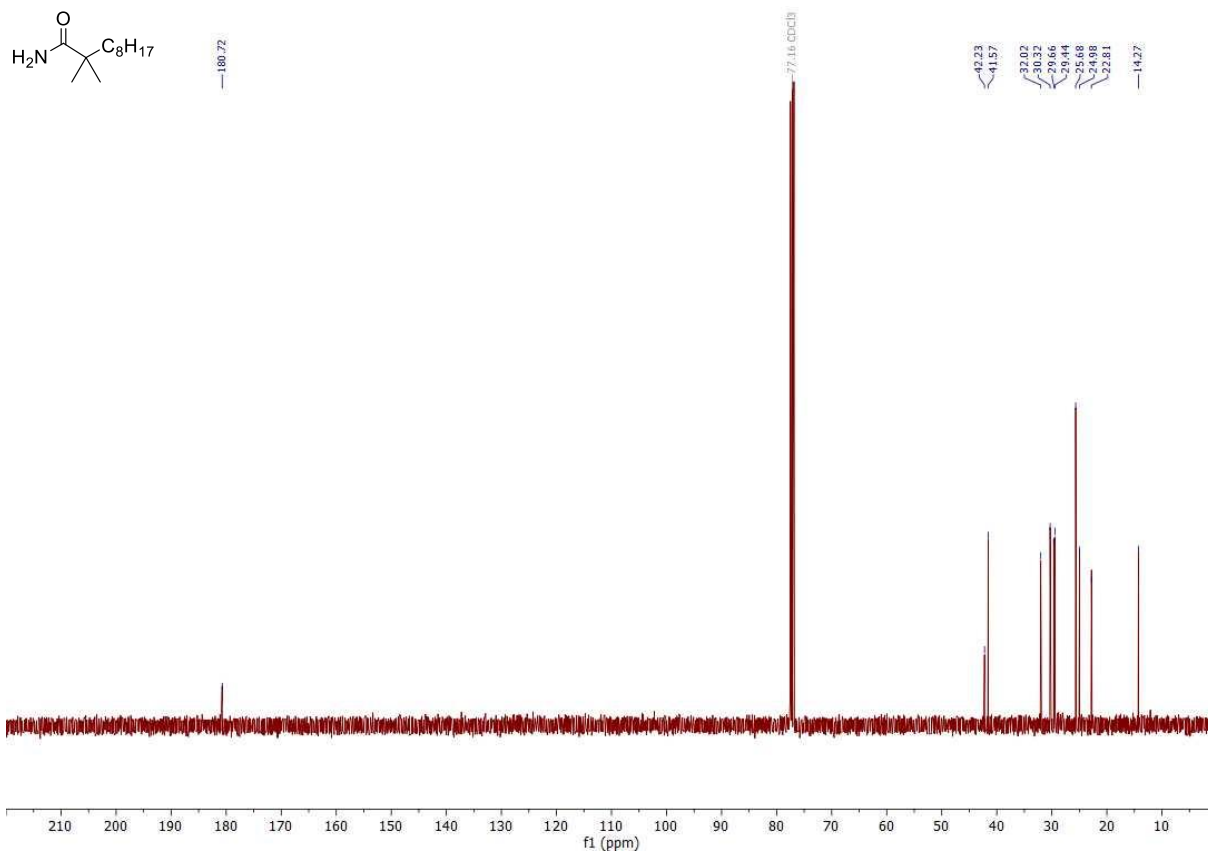

Figure S6:  $^{13}\text{C}$  NMR spectrum of **12** in  $\text{CDCl}_3$

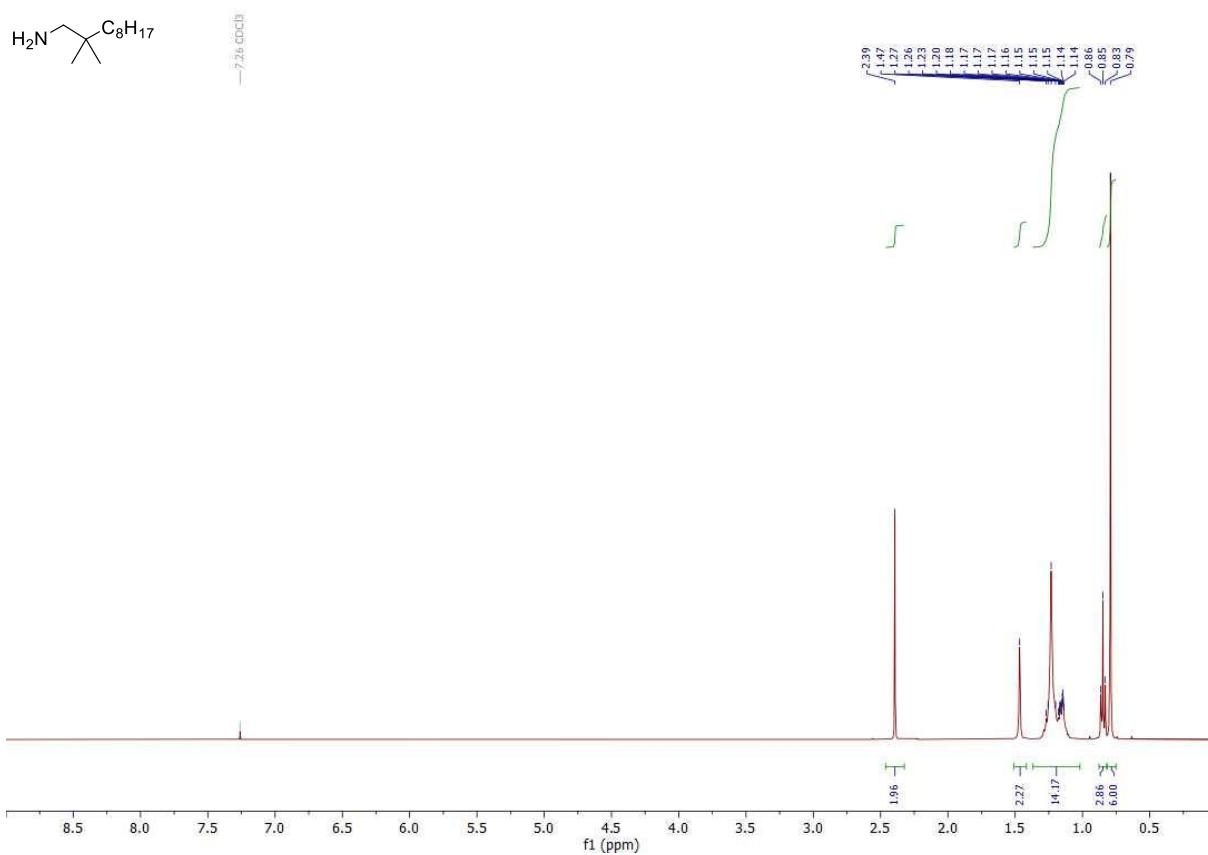

Figure S7:  $^1\text{H}$  NMR spectrum of **9d** in  $\text{CDCl}_3$

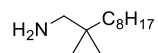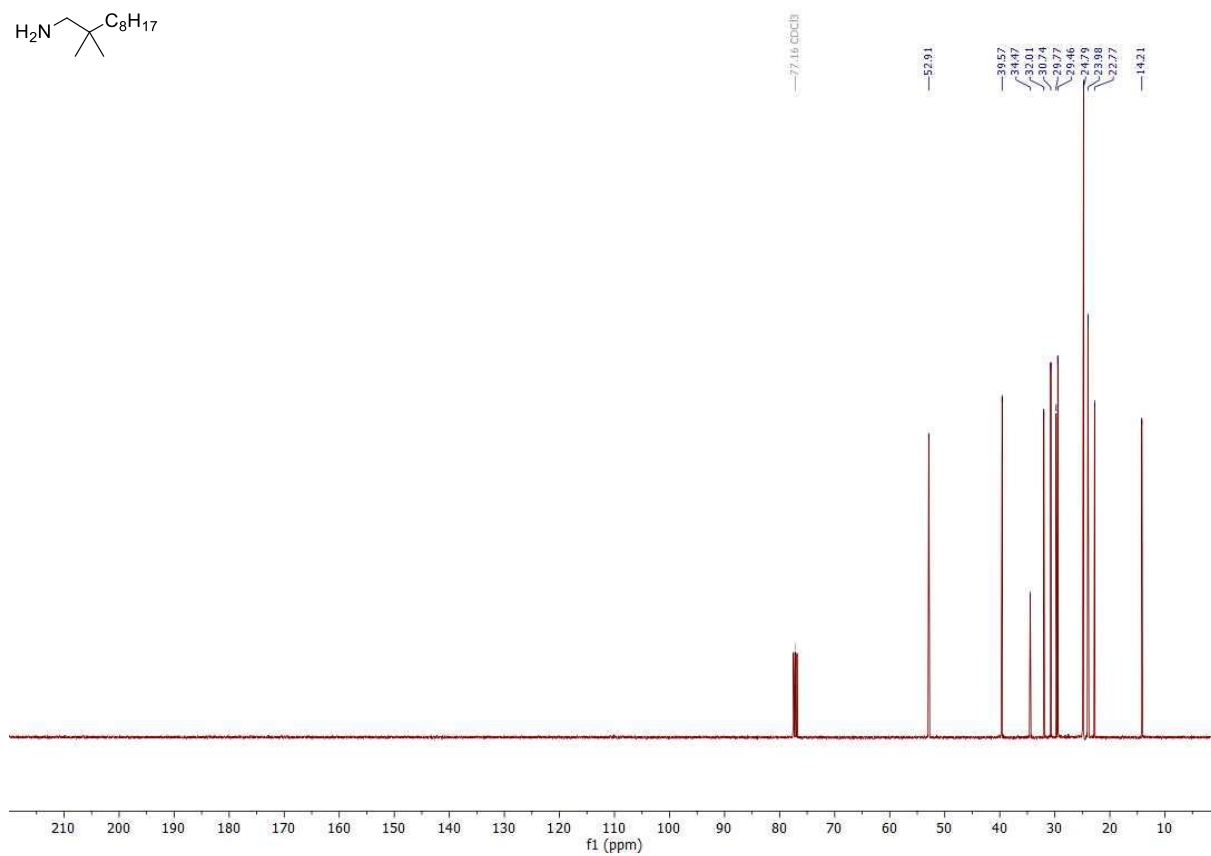

Figure S8:  $^{13}\text{C}$  NMR spectrum of **9d** in  $\text{CDCl}_3$

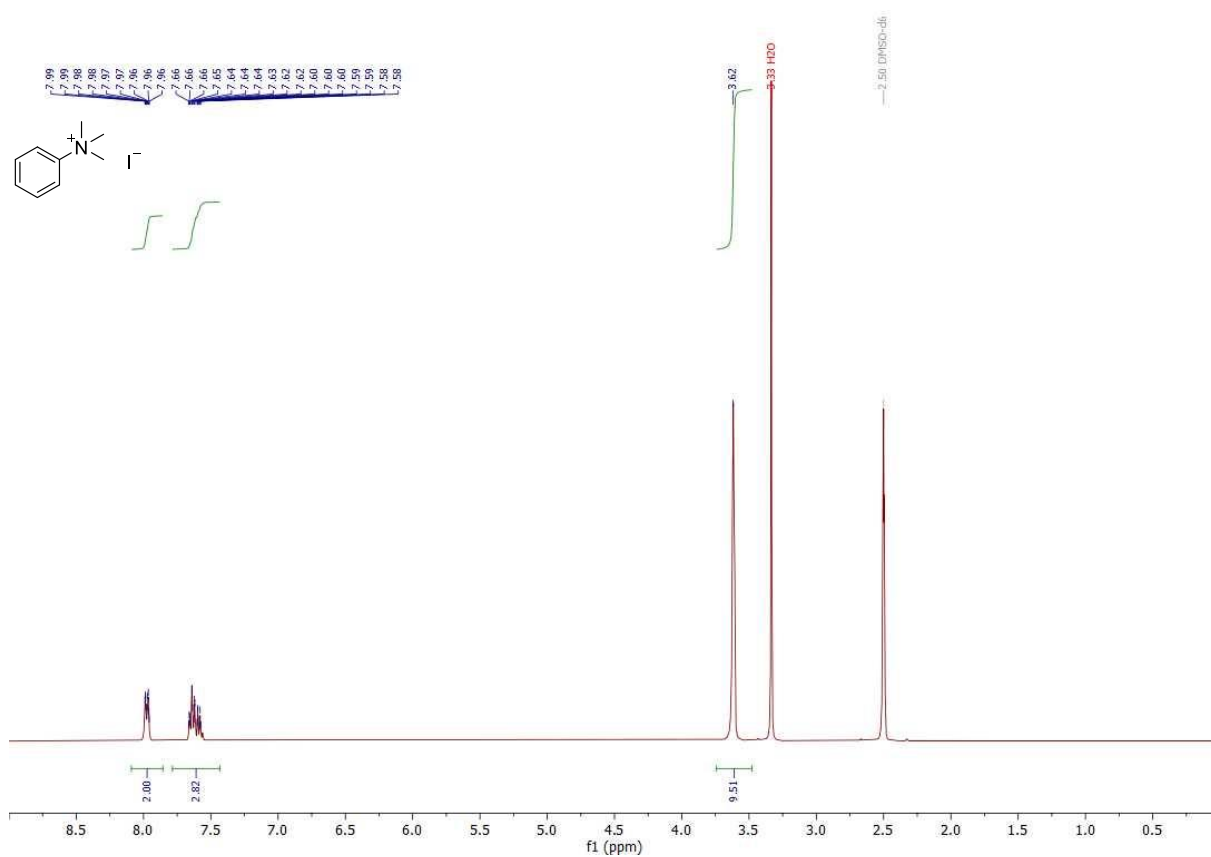

Figure S9:  $^1\text{H}$  NMR spectrum of **13a** in  $\text{DMSO}-d_6$

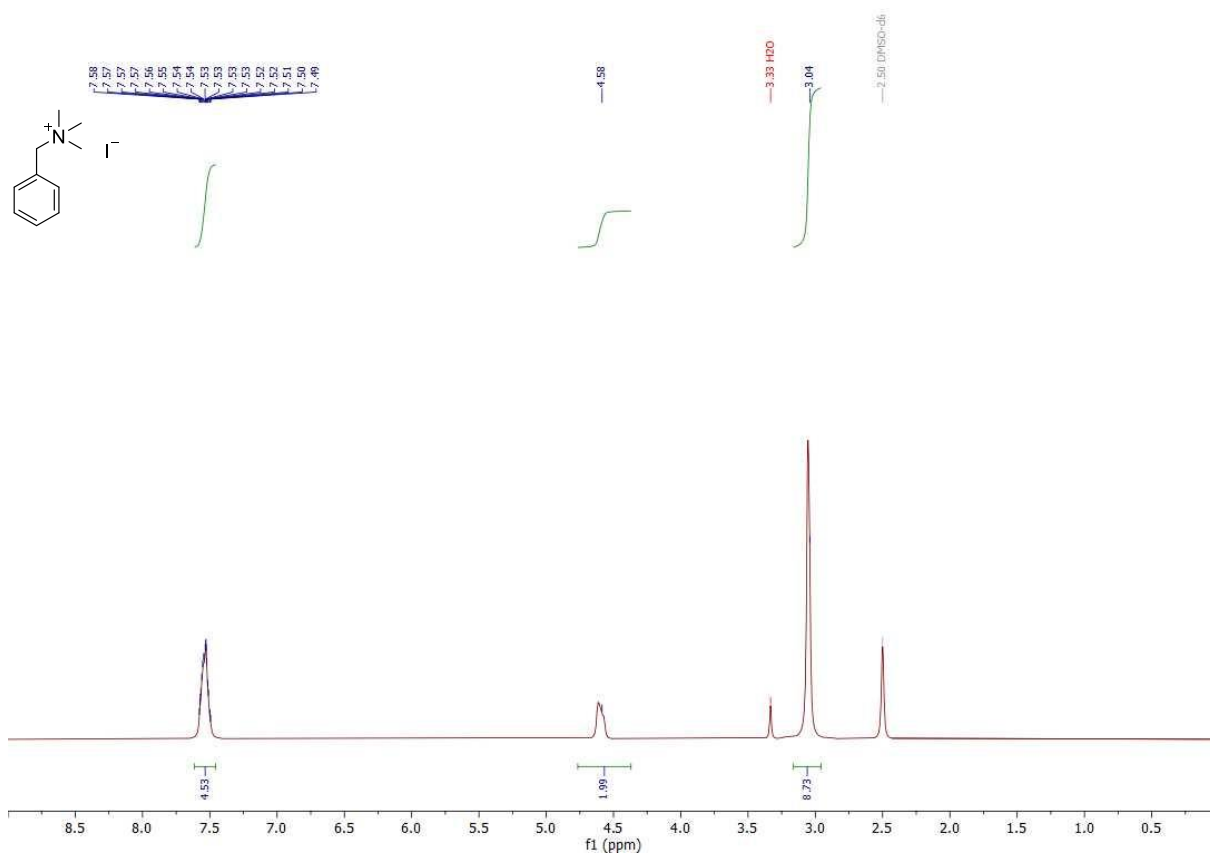

**Figure S10:** <sup>1</sup>H NMR spectrum of **13b** in DMSO-*d*<sub>6</sub>

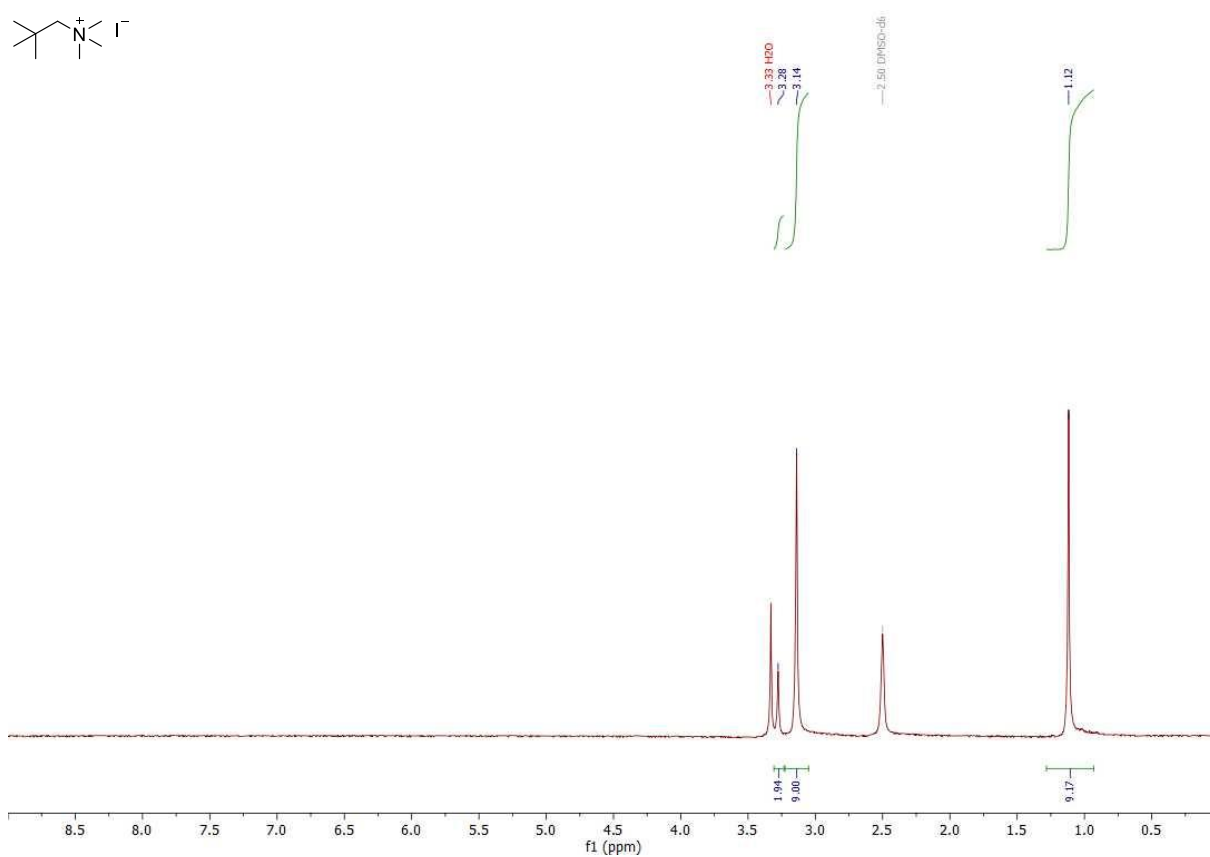

**Figure S11:** <sup>1</sup>H NMR spectrum of **13c** in DMSO-*d*<sub>6</sub>

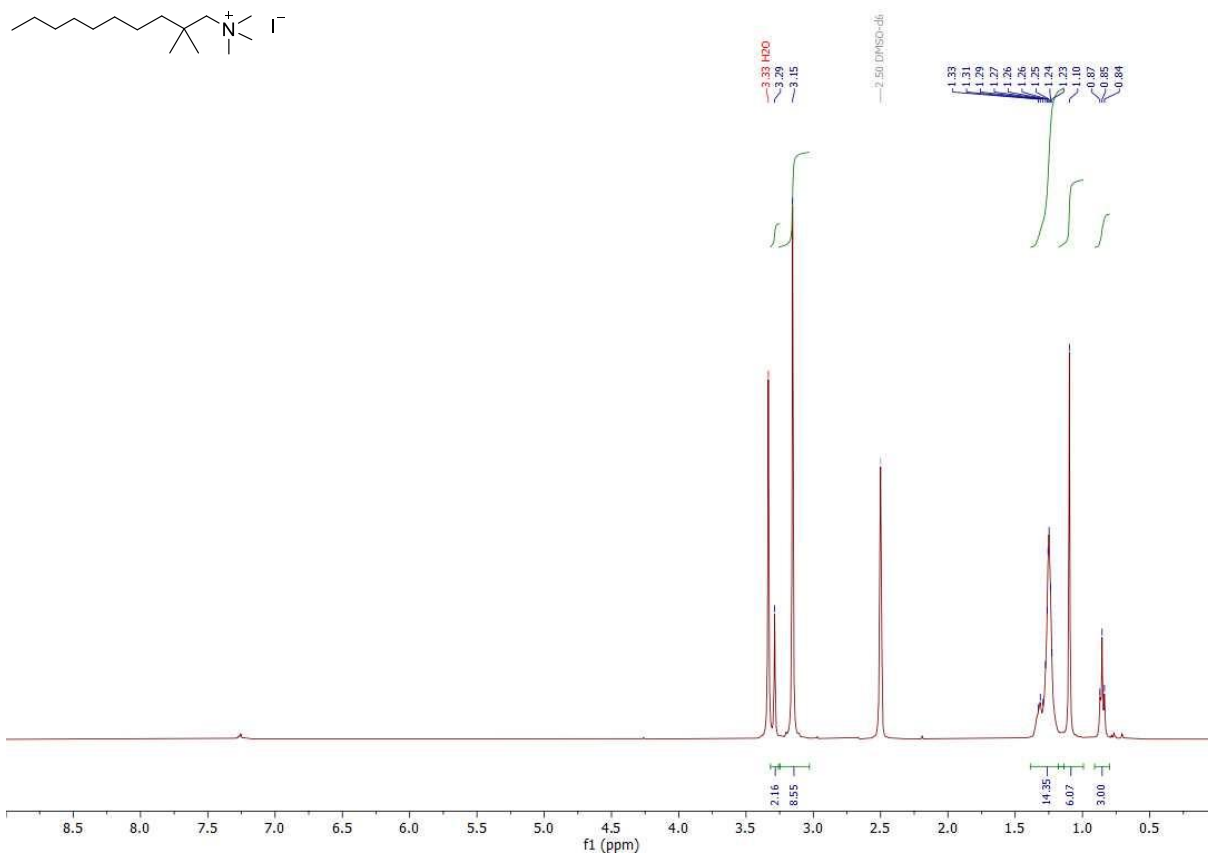

**Figure S12:**  $^1\text{H}$  NMR spectrum of **13d** in  $\text{DMSO-}d_6$

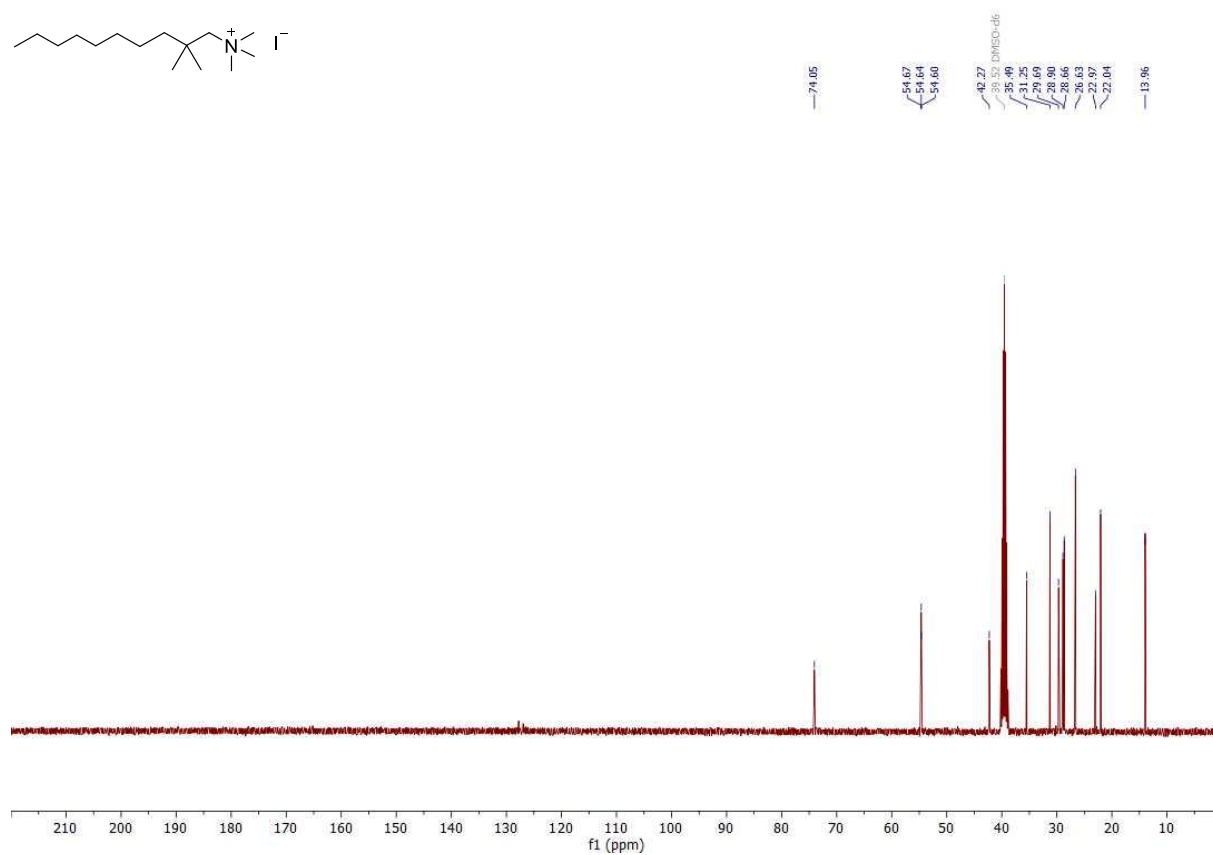

**Figure S13:**  $^{13}\text{C}$  NMR spectrum of **13d** in  $\text{DMSO-}d_6$



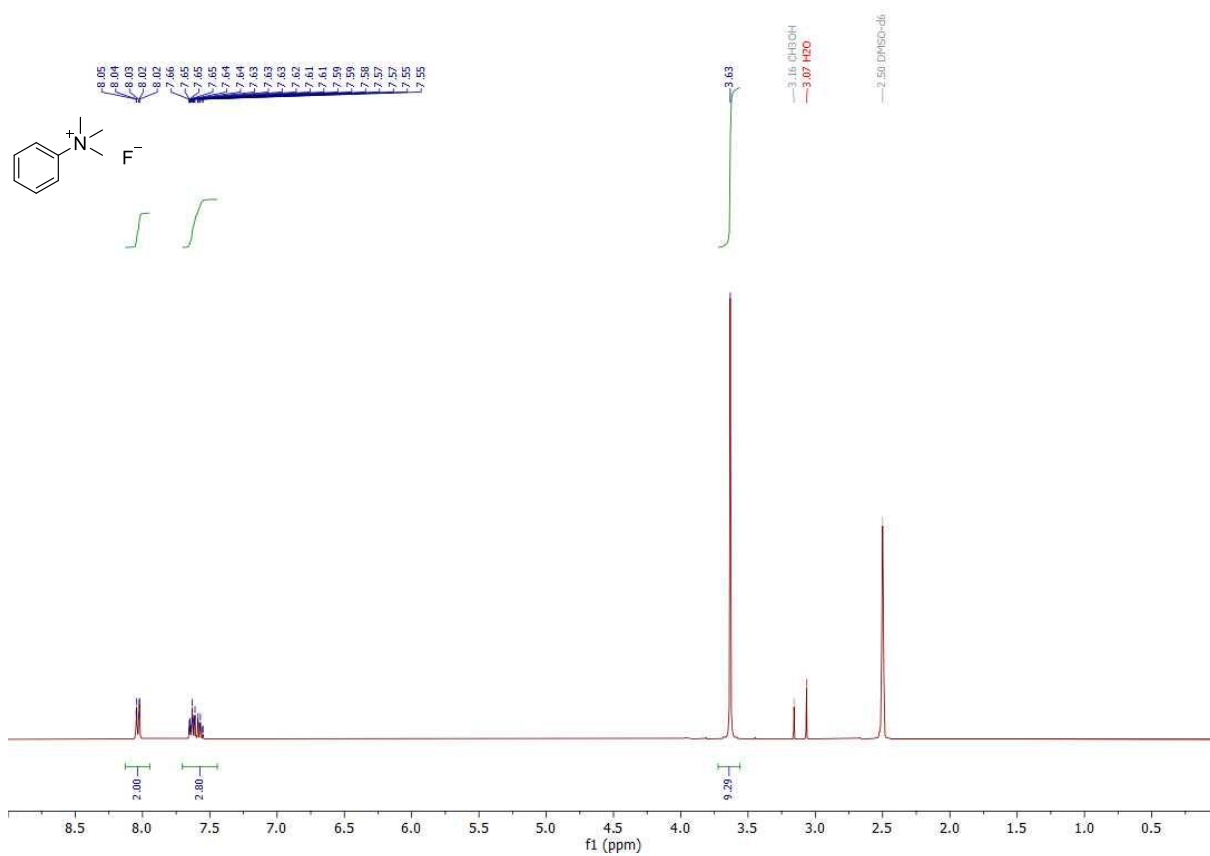

**Figure S14:**  $^1\text{H}$  NMR spectrum of **8a** in  $\text{DMSO-}d_6$

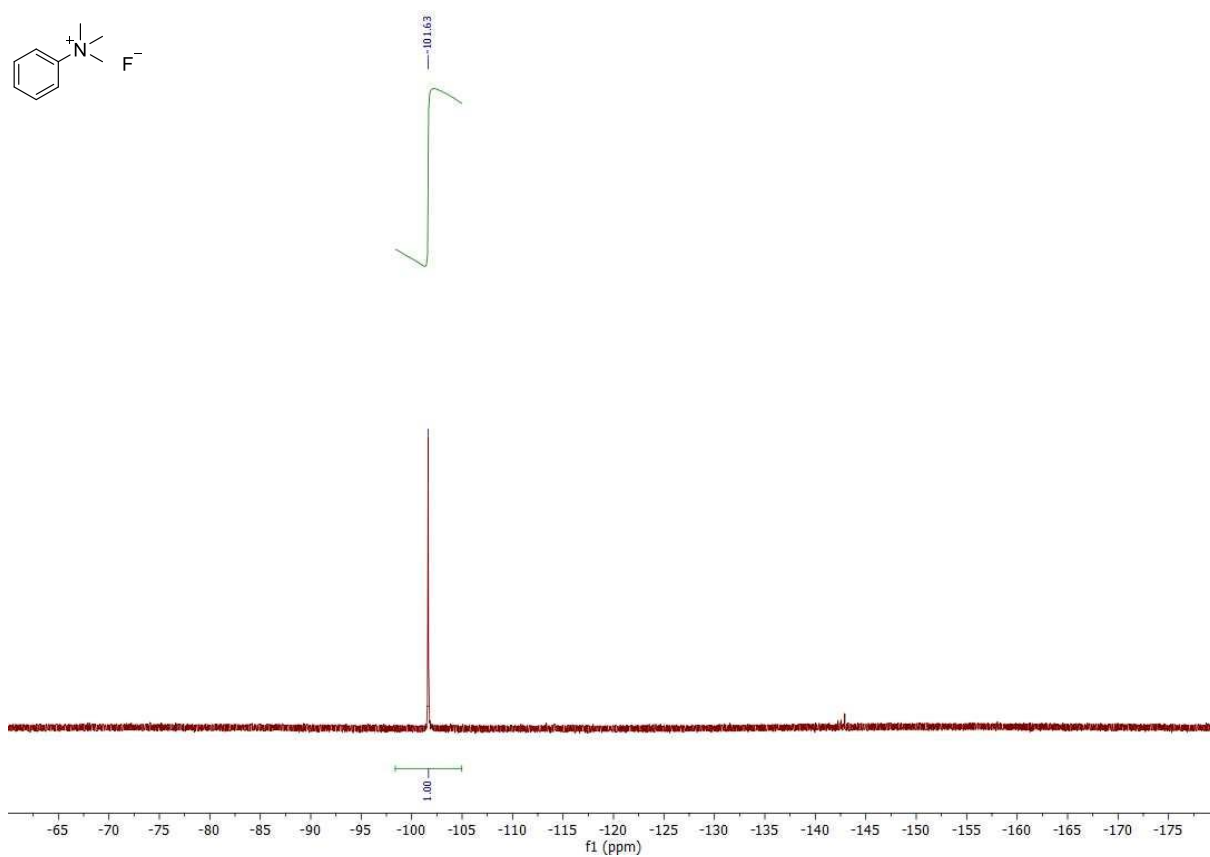

**Figure S15:**  $^{19}\text{F}$  NMR spectrum of **8a** in  $\text{DMSO-}d_6$

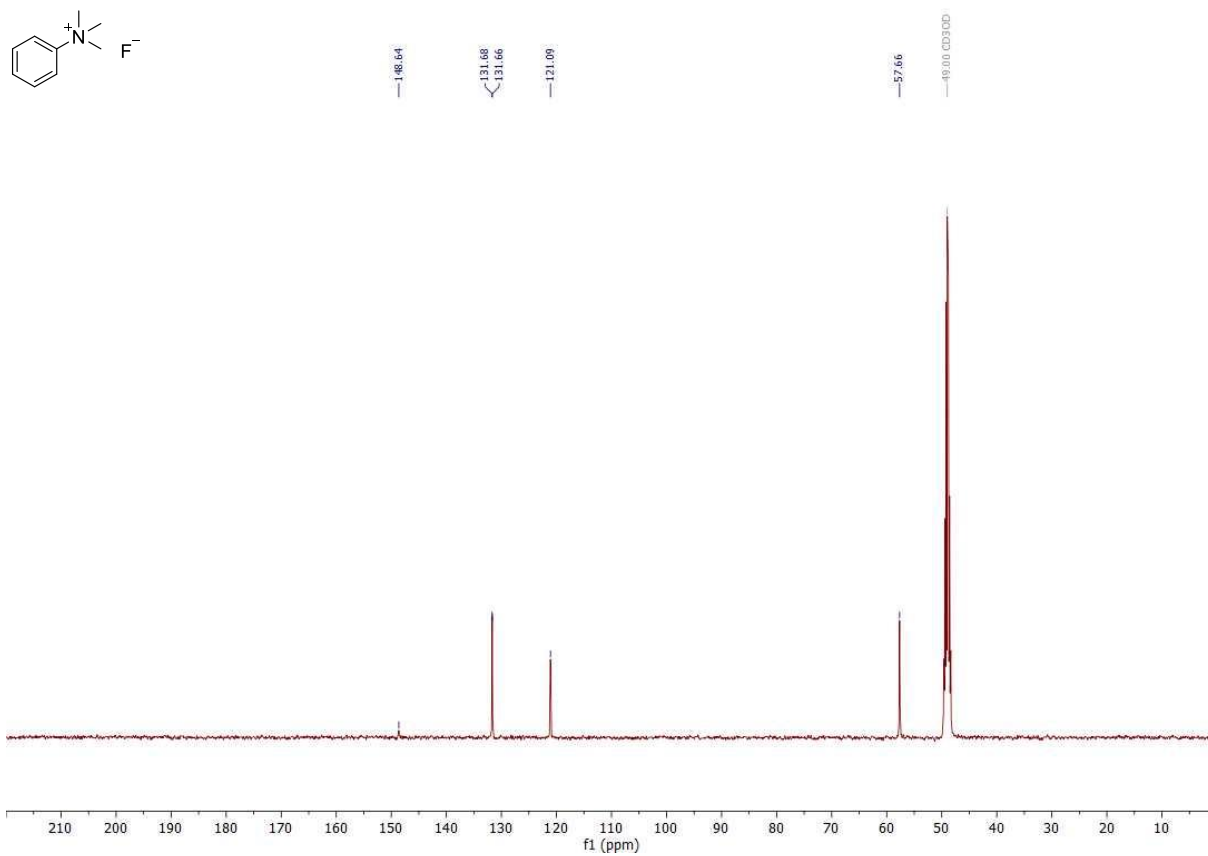

**Figure S16:**  $^{13}\text{C}$  NMR spectrum of **8a** in  $\text{CD}_3\text{OD}$

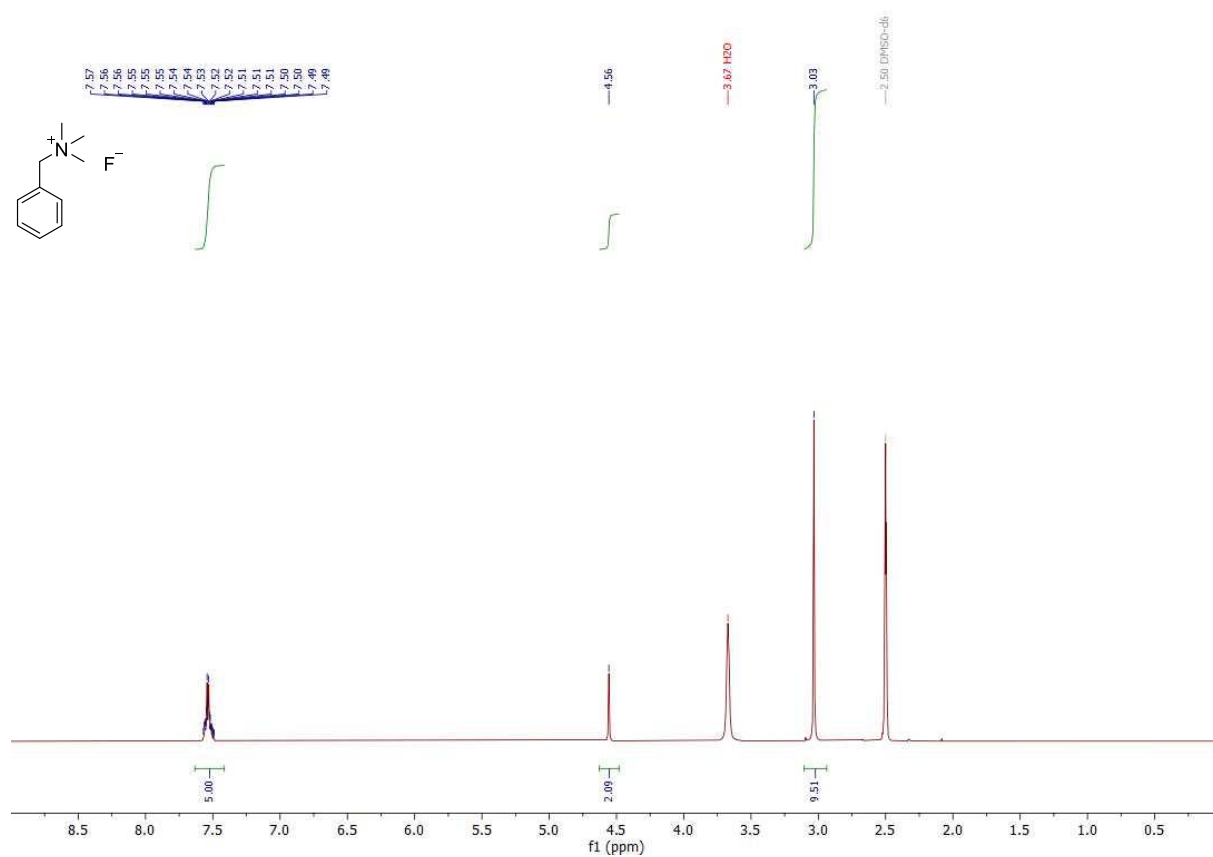

**Figure S17:**  $^1\text{H}$  NMR spectrum of **8b** in  $\text{DMSO}-d_6$

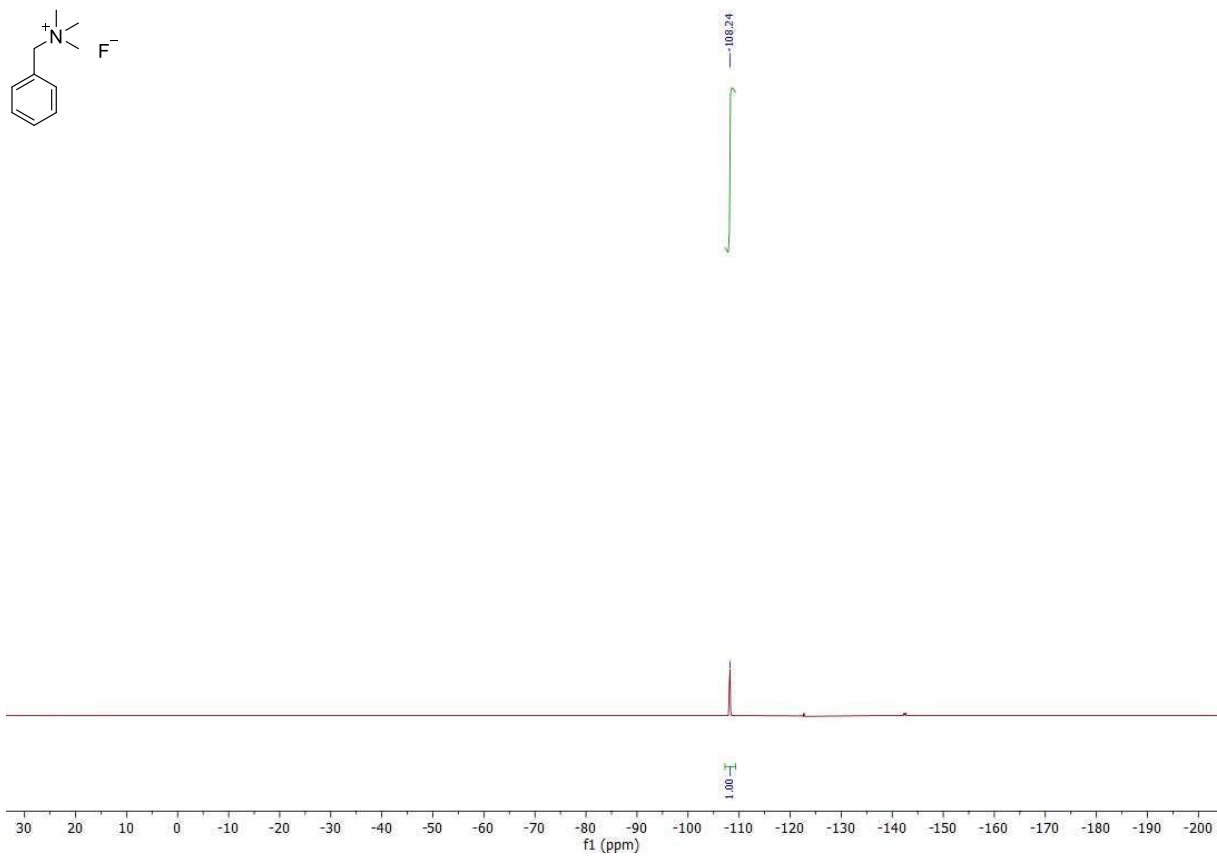

**Figure S18:**  $^{19}\text{F}$  NMR spectrum of **8b** in  $\text{DMSO-}d_6$

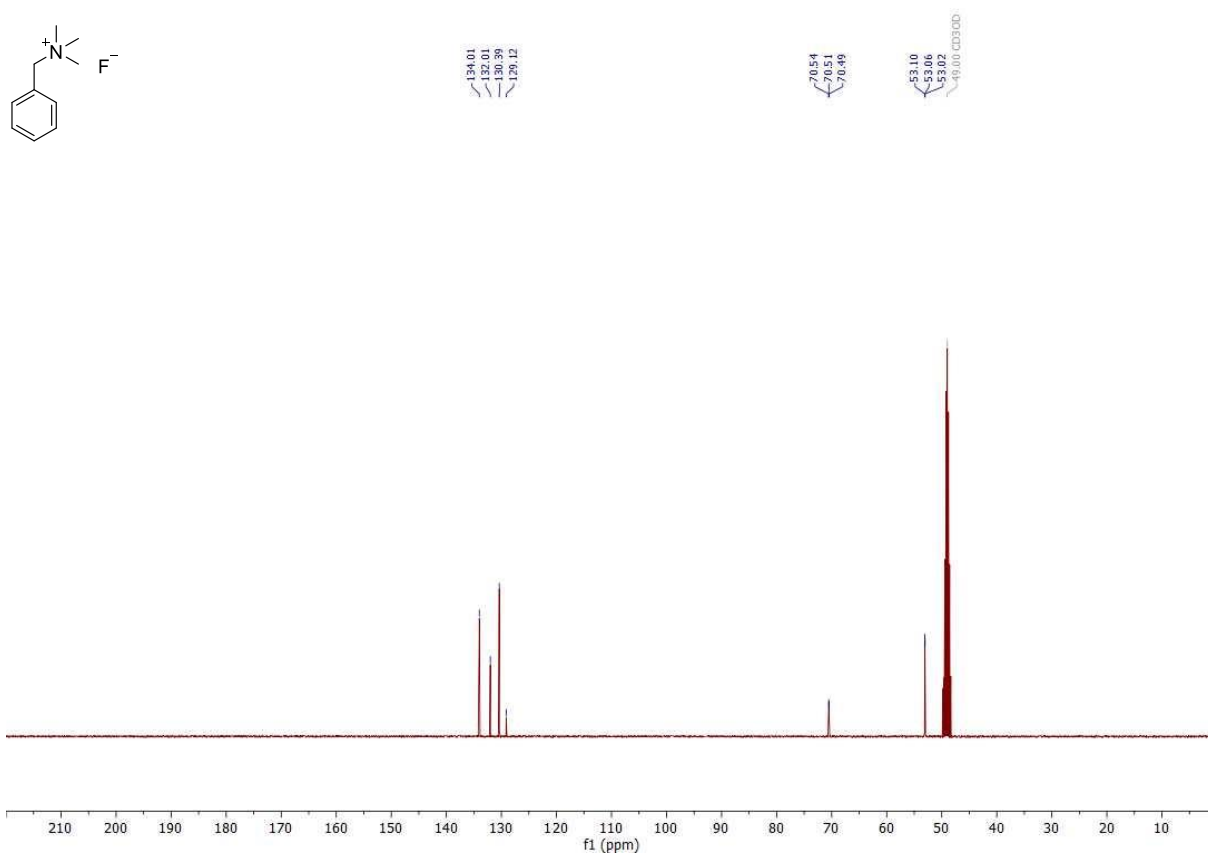

**Figure S19:**  $^{13}\text{C}$  NMR spectrum of **8b** in  $\text{CD}_3\text{OD}$

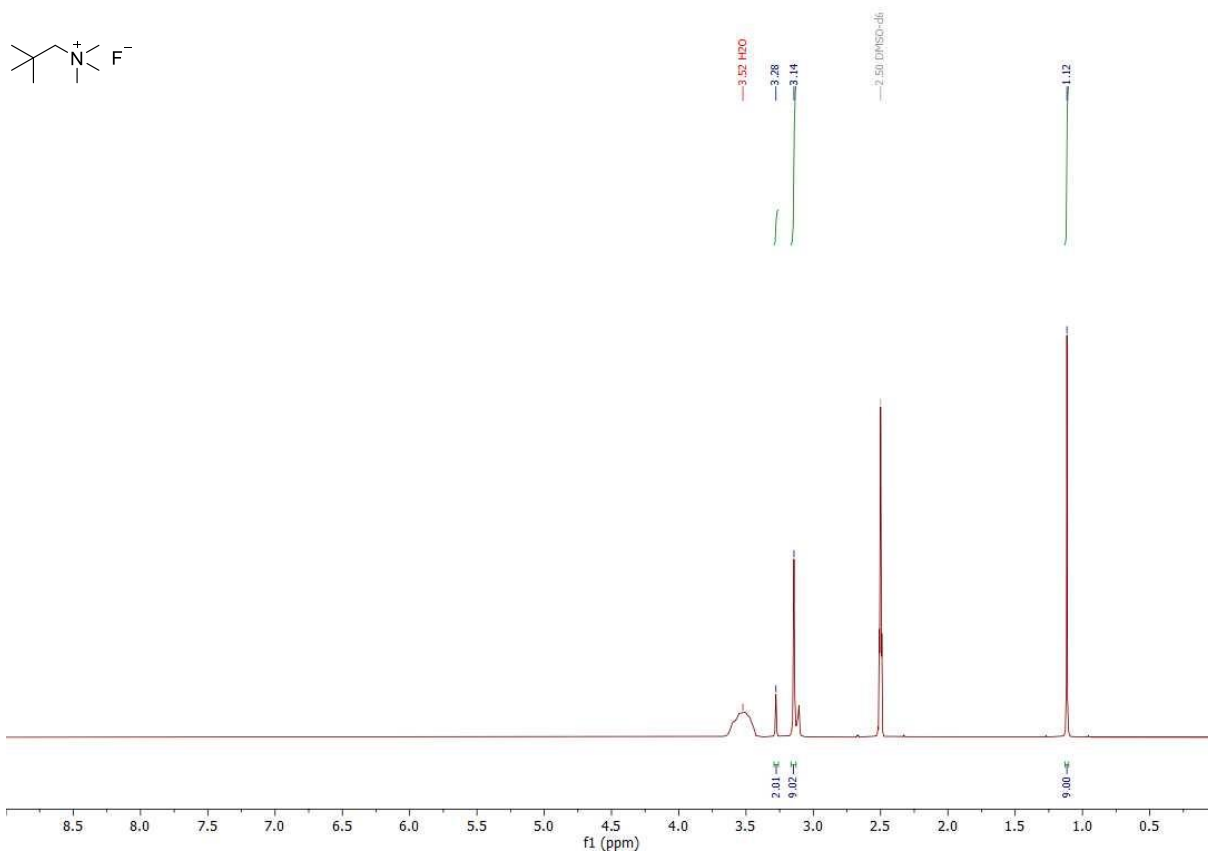

Figure S20:  $^1\text{H}$  NMR spectrum of **8c** in  $\text{DMSO-}d_6$

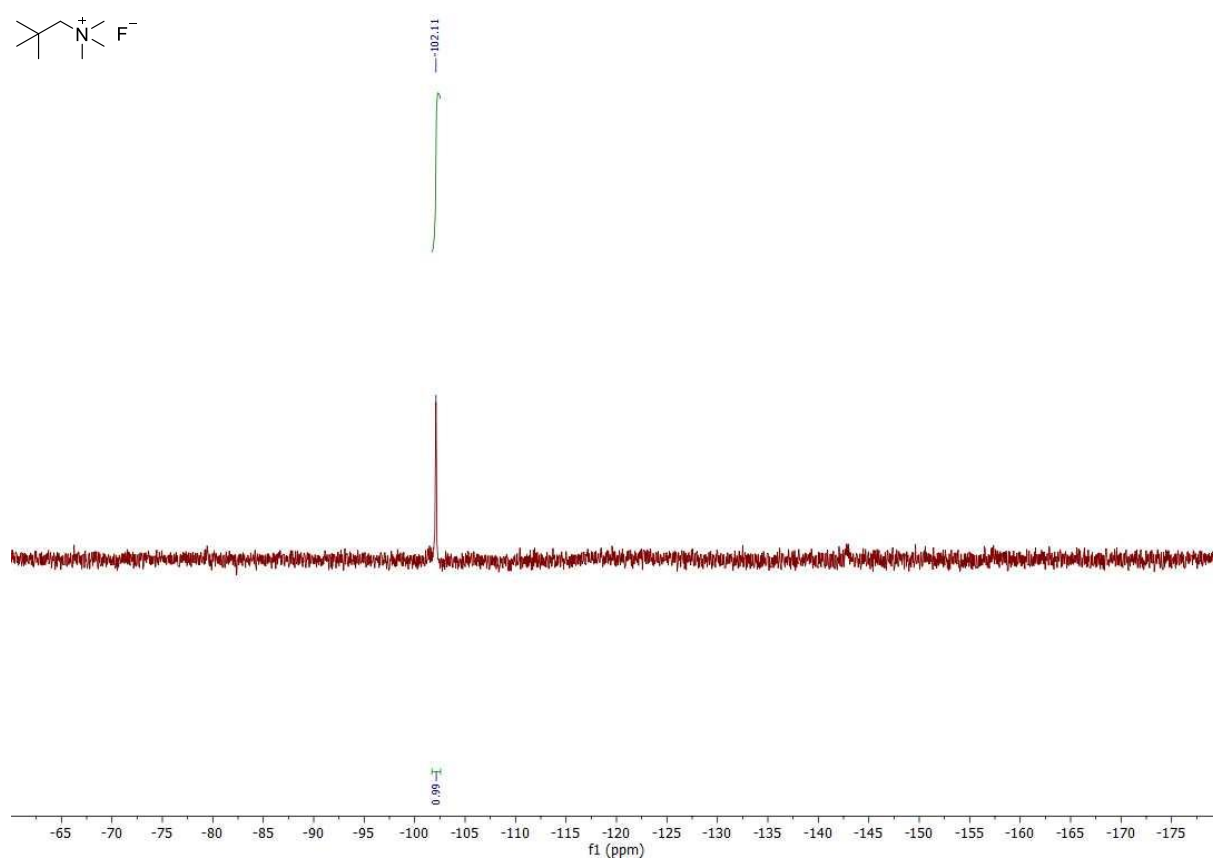

Figure S21:  $^{19}\text{F}$  NMR spectrum of **8c** in  $\text{DMSO-}d_6$

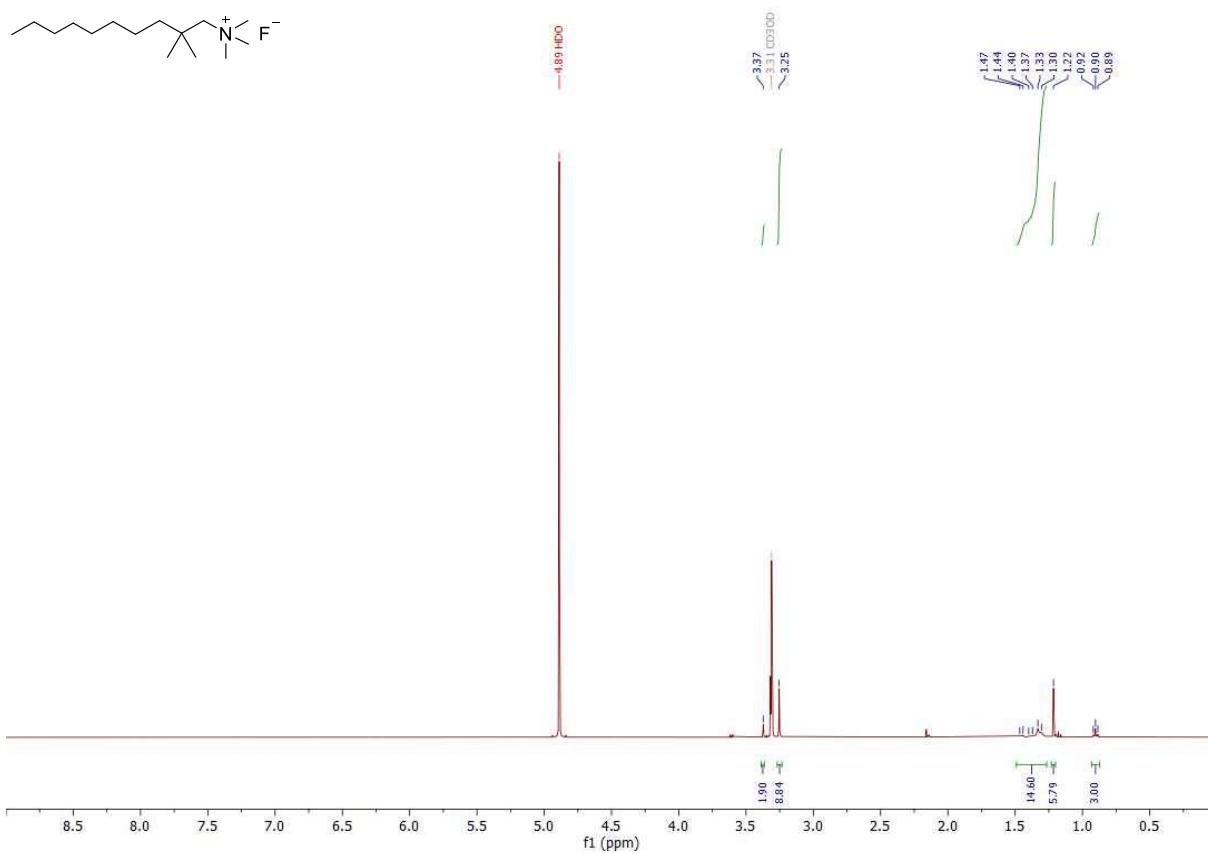

Figure S22:  $^1\text{H}$  NMR spectrum of **8d** in  $\text{CD}_3\text{OD}$

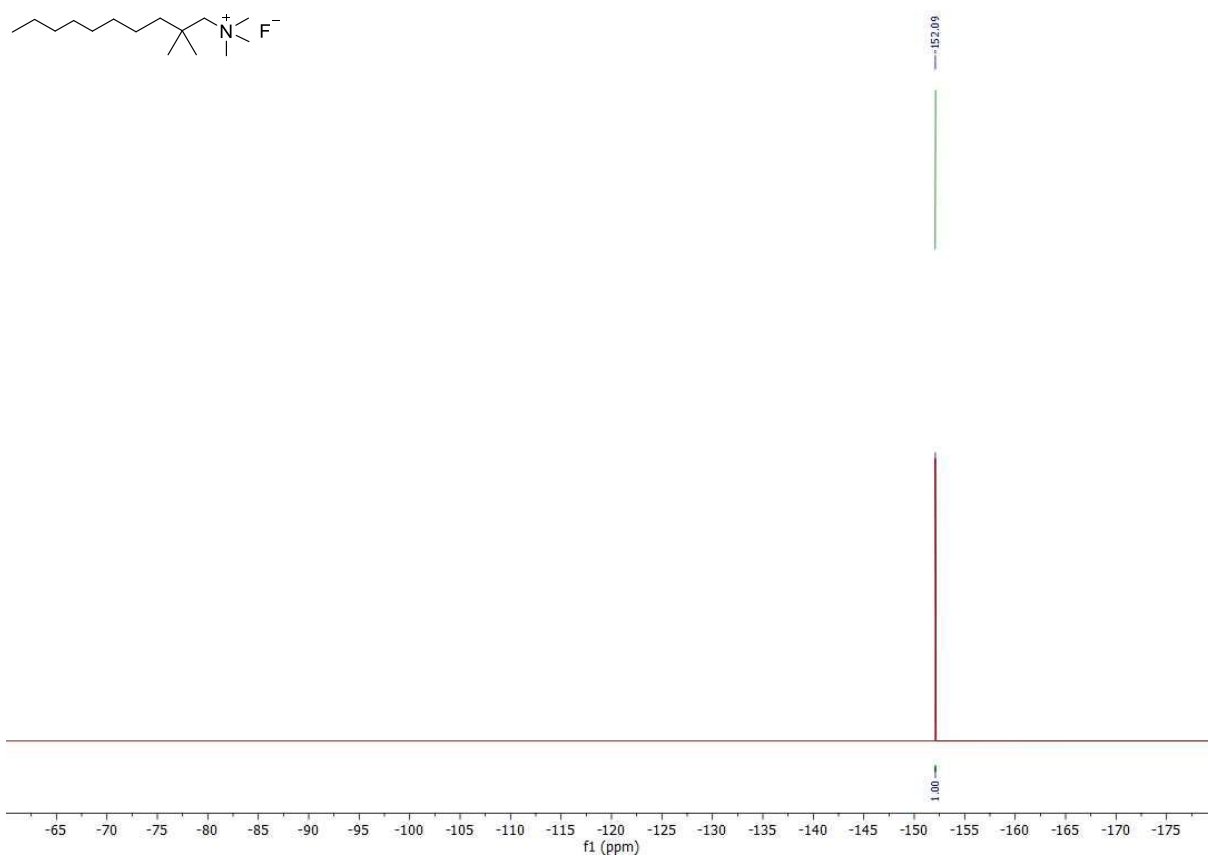

Figure S23:  $^{19}\text{F}$  NMR spectrum of **8d** in  $\text{CD}_3\text{OD}$

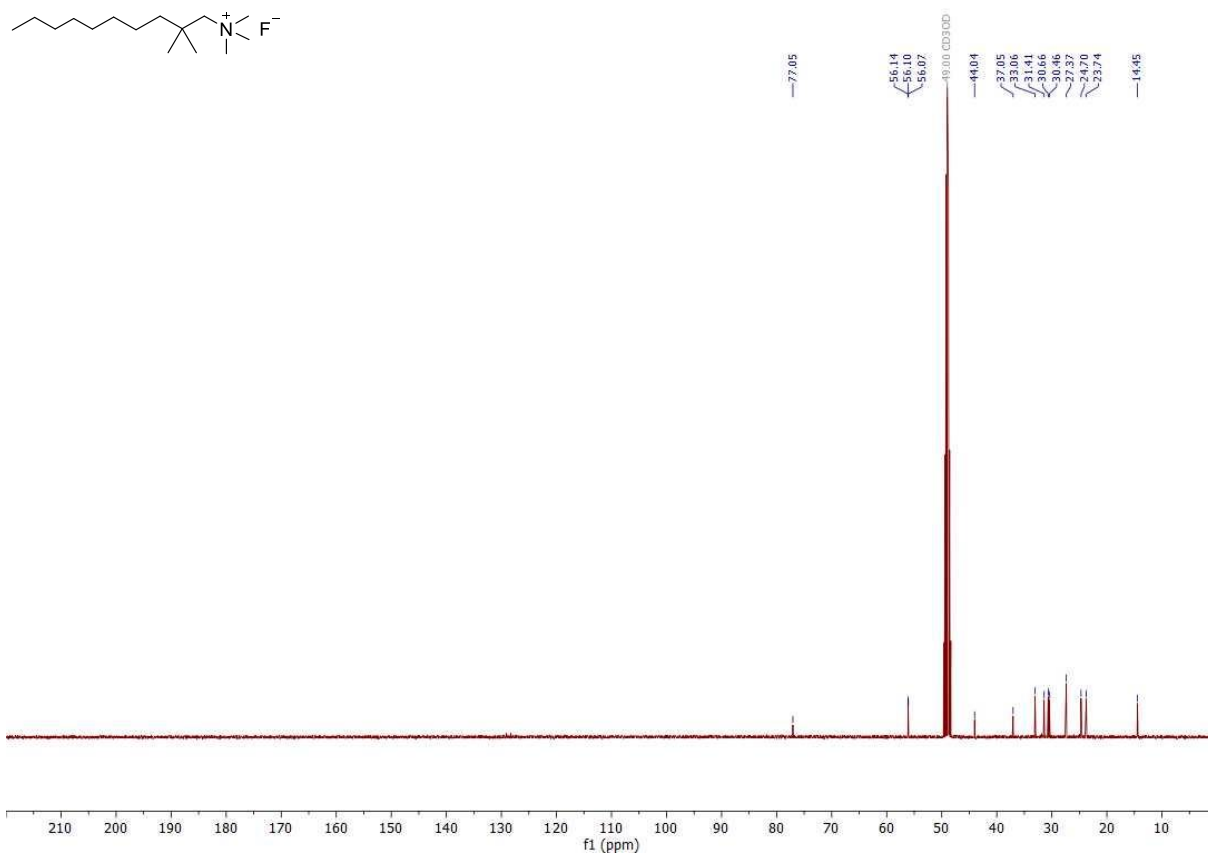

Figure S24:  $^{13}\text{C}$  NMR spectrum of 8d in  $\text{CD}_3\text{OD}$

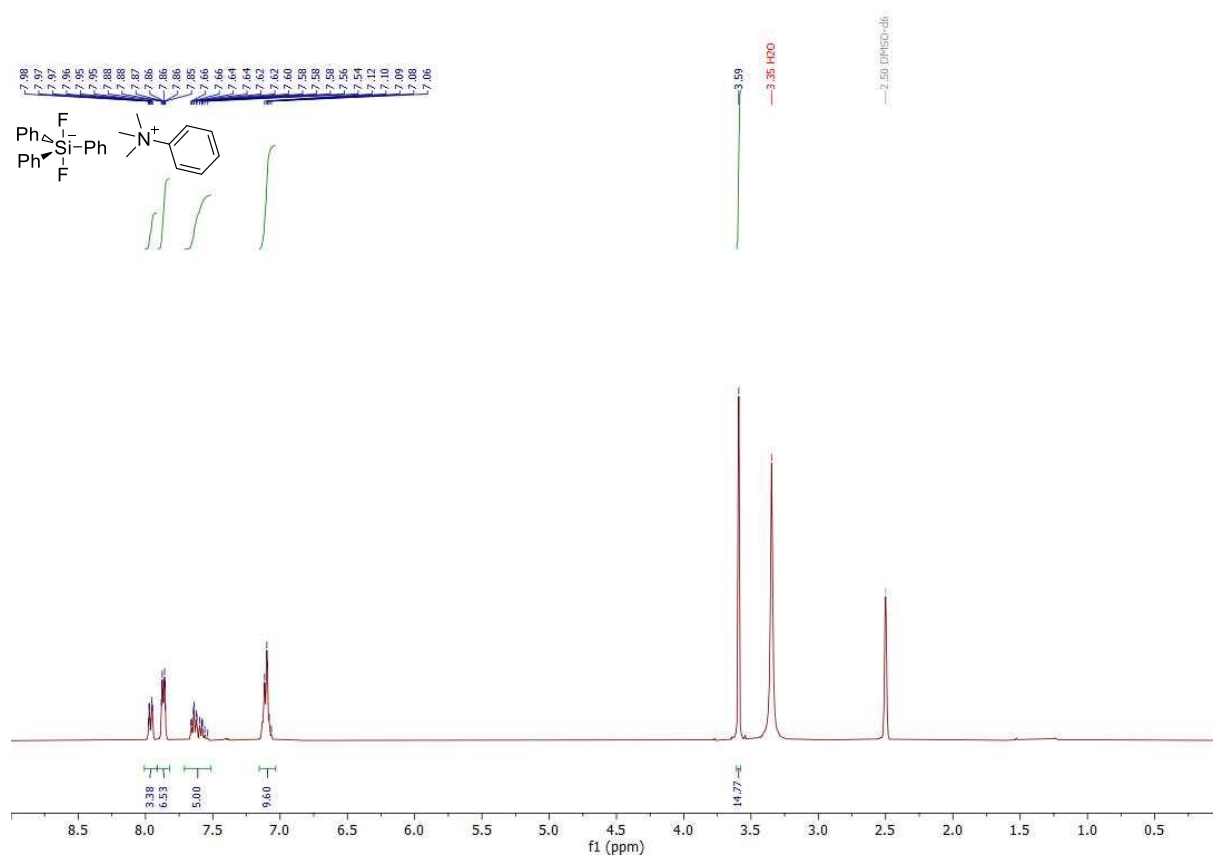

Figure S25:  $^1\text{H}$  NMR spectrum of 7a in  $\text{DMSO-}d_6$

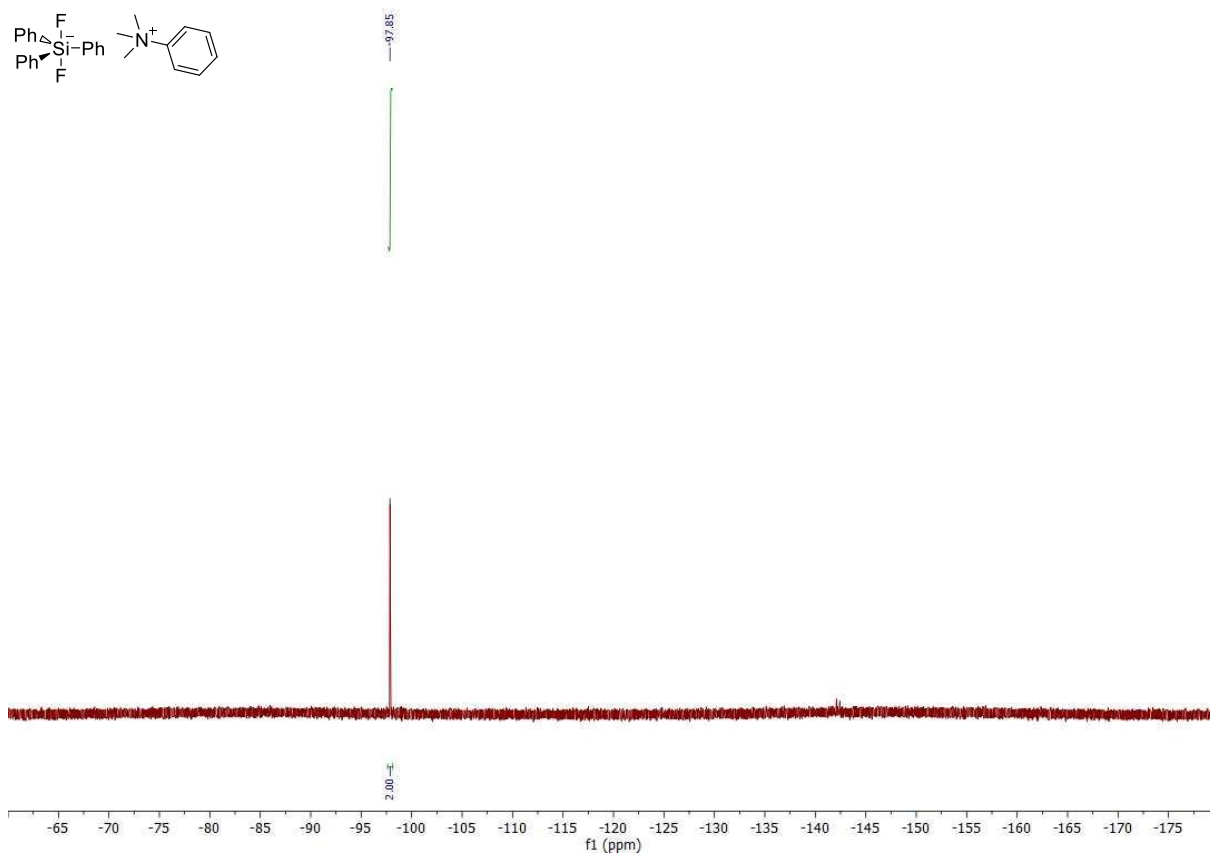

**Figure S26:** <sup>19</sup>F NMR spectrum of **7a** in DMSO-*d*<sub>6</sub>

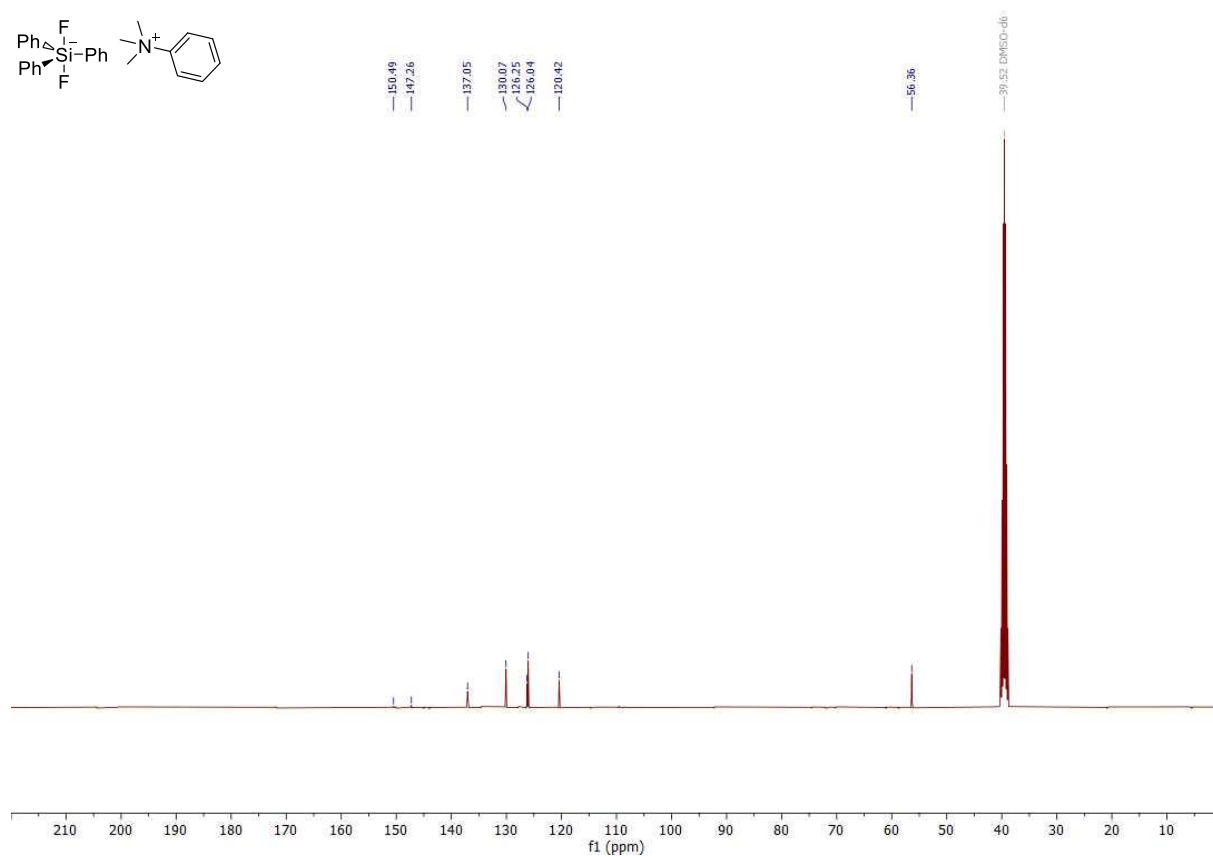

**Figure S27:** <sup>13</sup>C NMR spectrum of **7a** in DMSO-*d*<sub>6</sub>

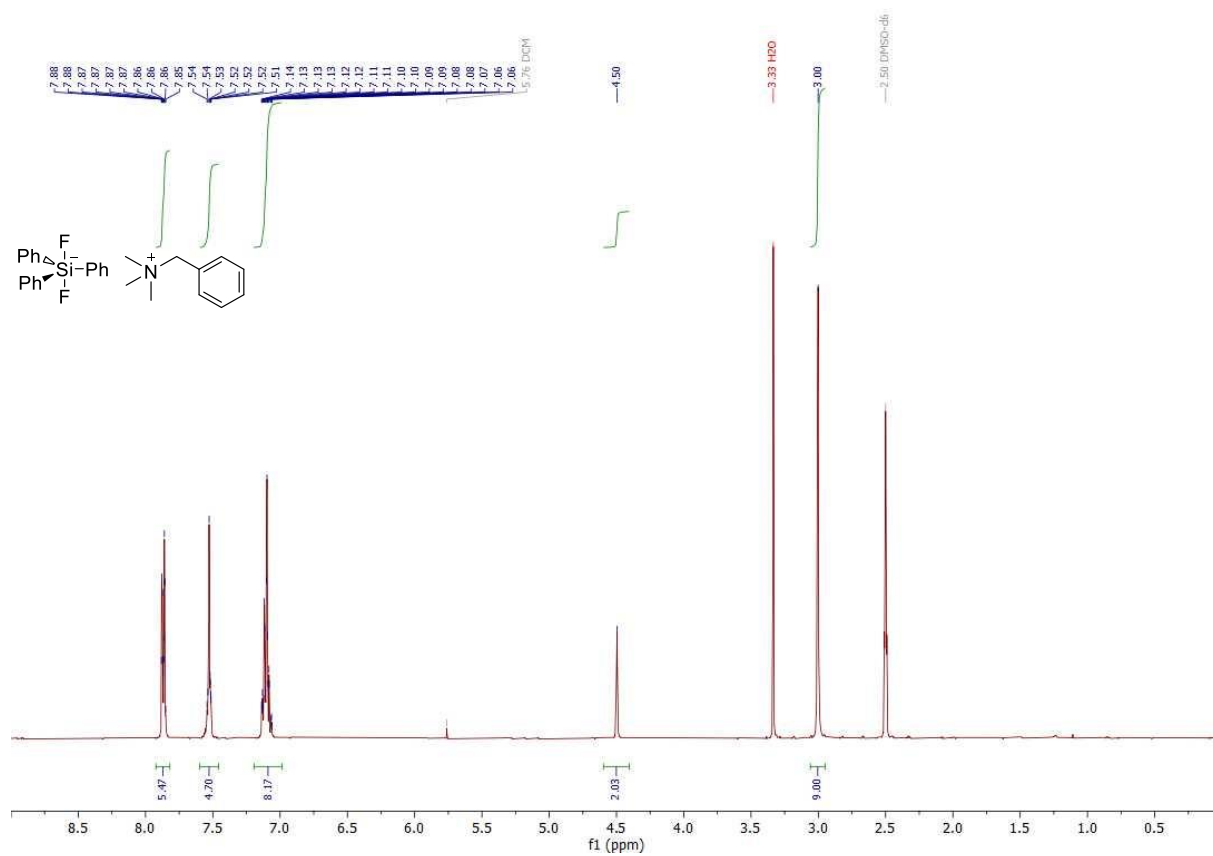

**Figure S28:** <sup>1</sup>H NMR spectrum of **7b** in DMSO-*d*<sub>6</sub>

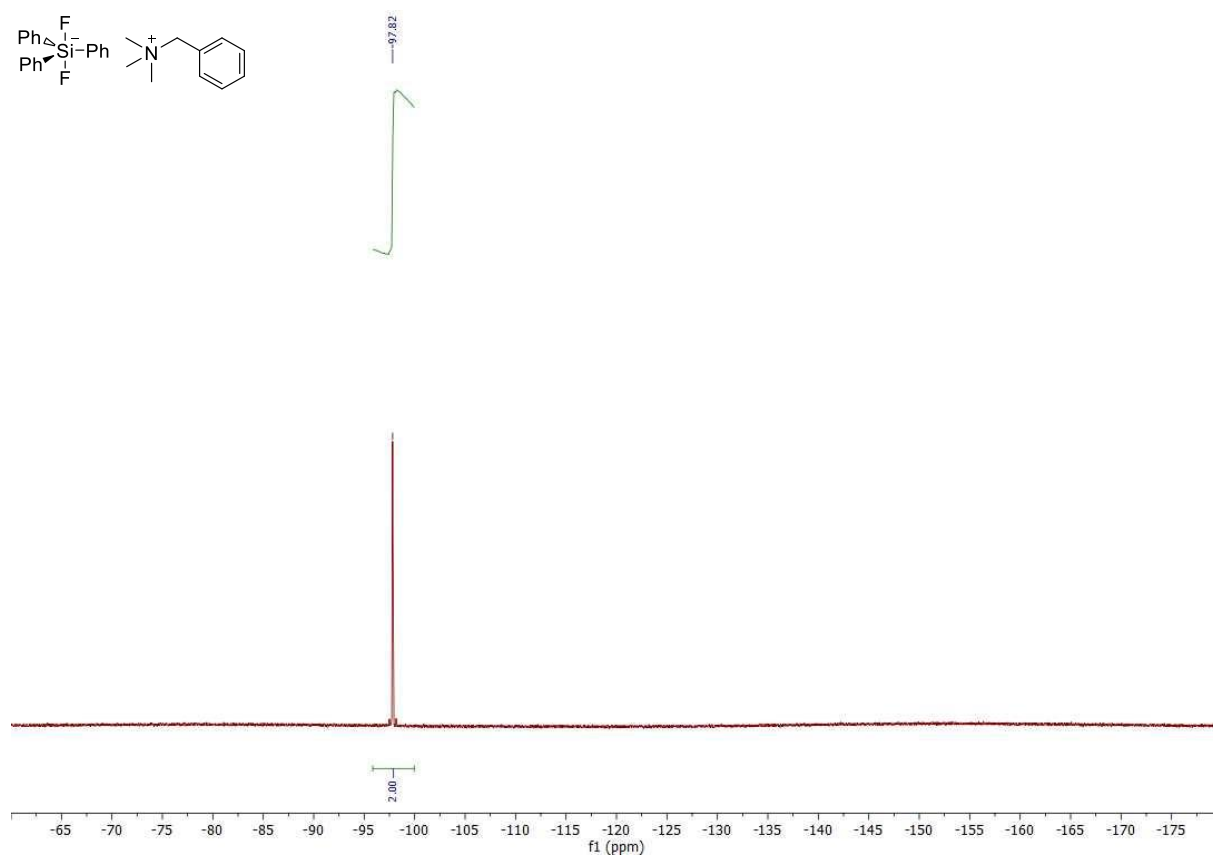

**Figure S29:** <sup>19</sup>F NMR spectrum of **7b** in DMSO-*d*<sub>6</sub>



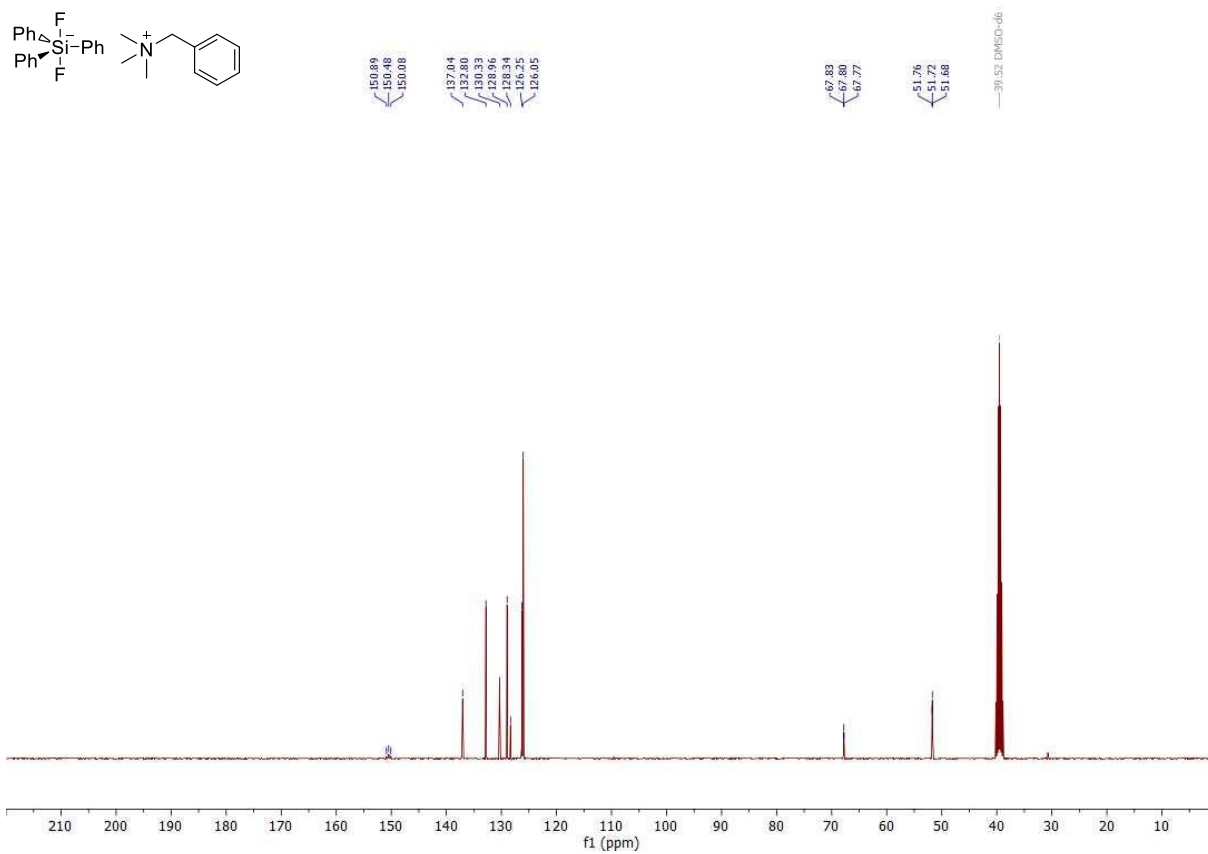

**Figure S30:**  $^{13}\text{C}$  NMR spectrum of **7b** in DMSO- $d_6$

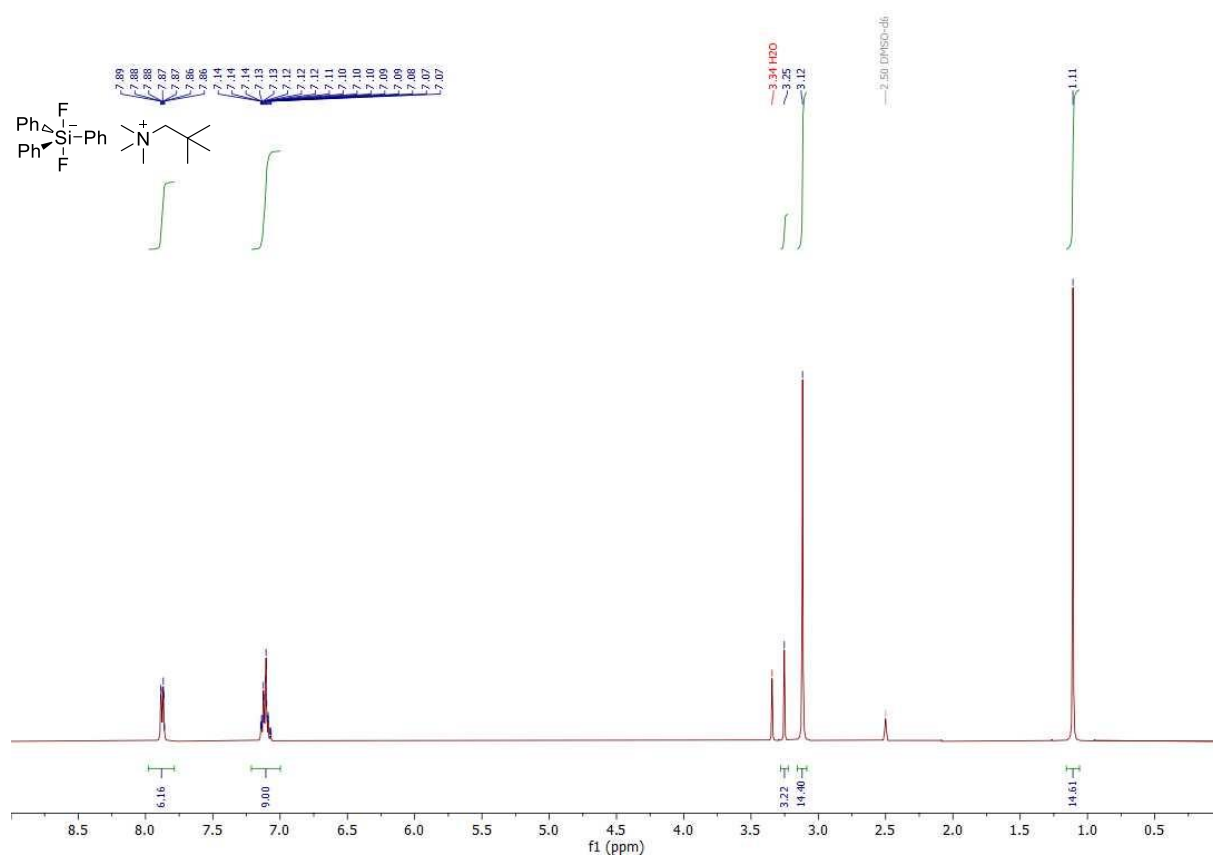

**Figure S31:**  $^1\text{H}$  NMR spectrum of **7c** in DMSO- $d_6$

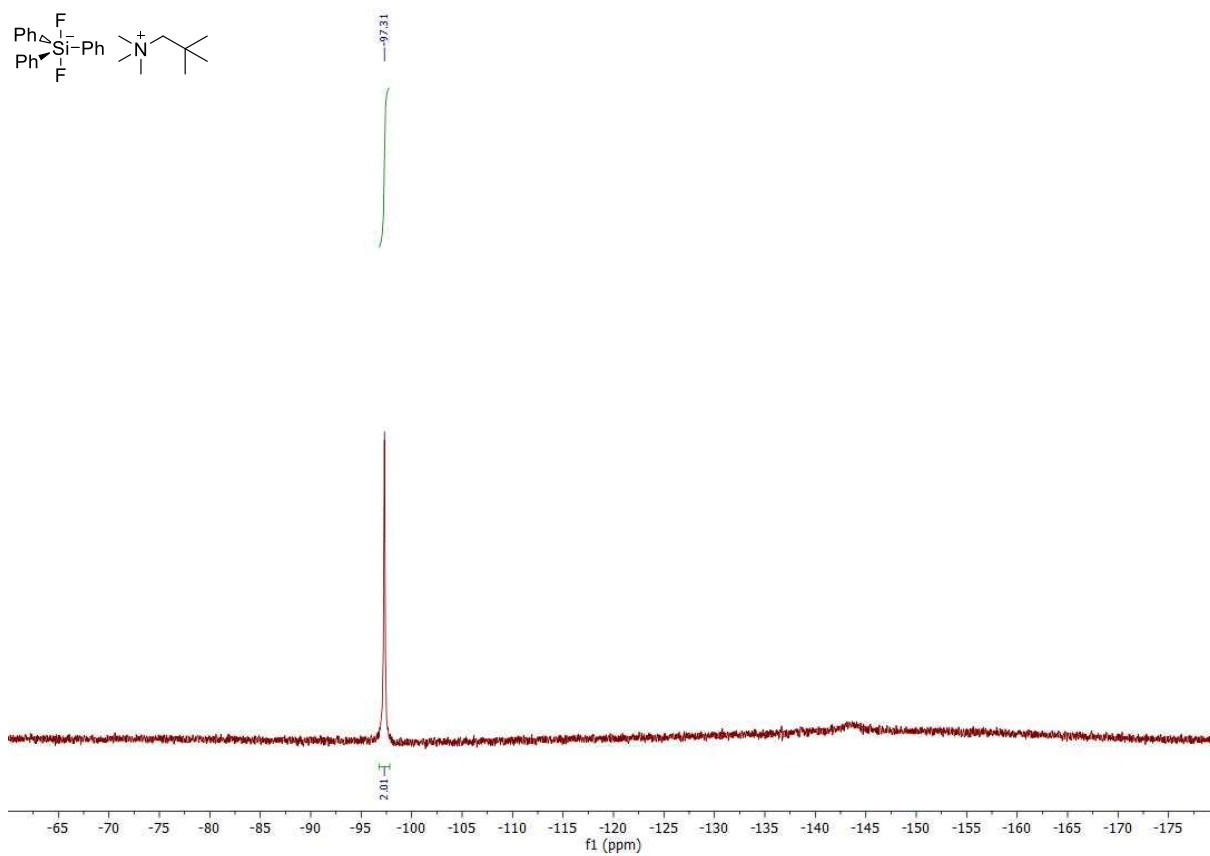

**Figure S32:**  $^{19}\text{F}$  NMR spectrum of **7c** in  $\text{DMSO-}d_6$

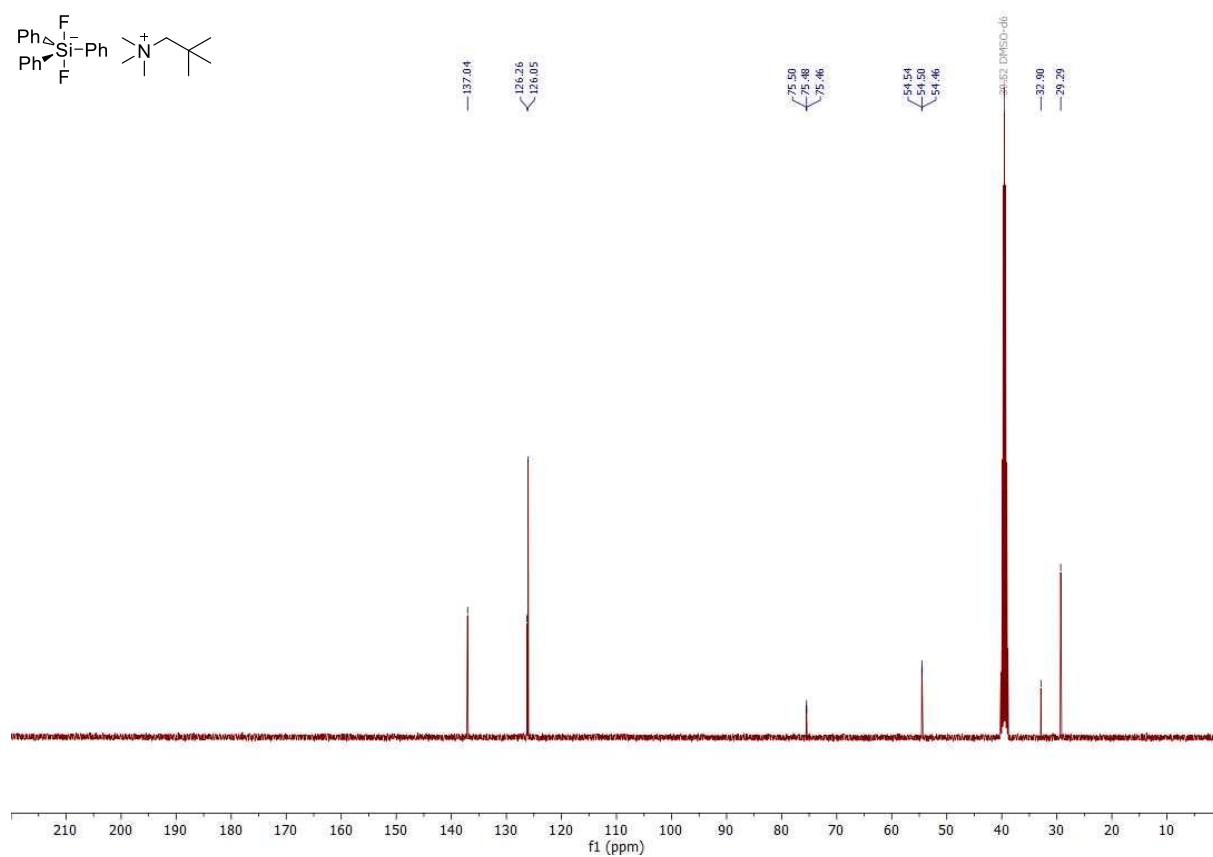

**Figure S33:**  $^{13}\text{C}$  NMR spectrum of **7c** in  $\text{DMSO-}d_6$

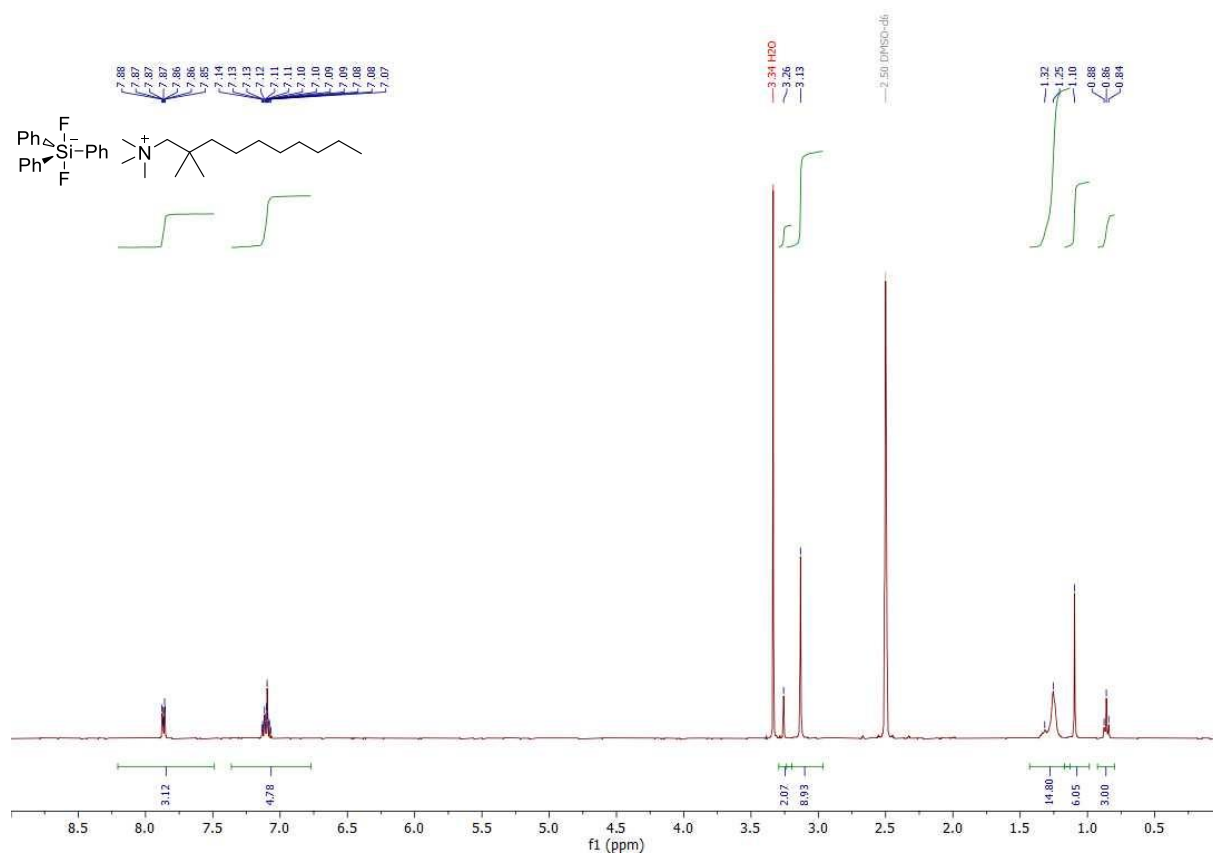

**Figure S34:** <sup>1</sup>H NMR spectrum of **7d** in DMSO-*d*<sub>6</sub>

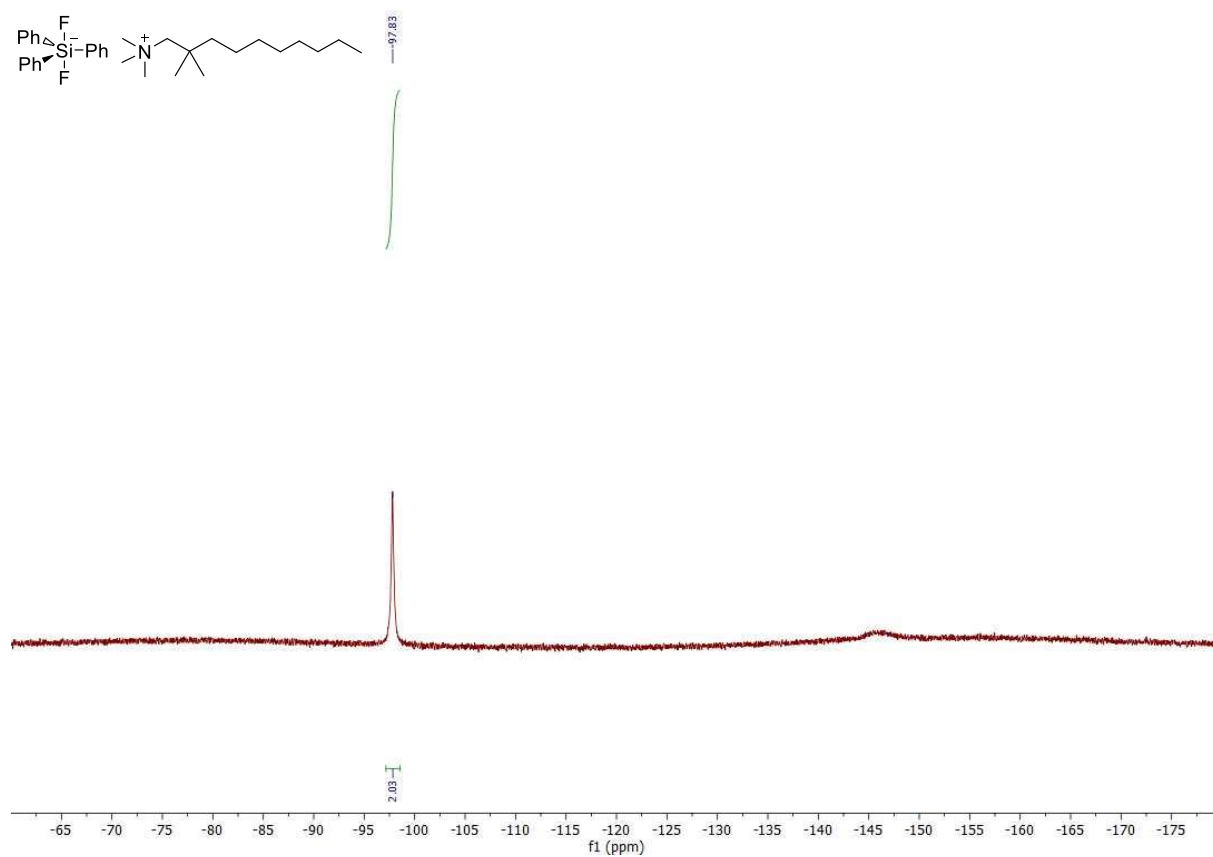

**Figure S35:** <sup>19</sup>F NMR spectrum of **7d** in DMSO-*d*<sub>6</sub>

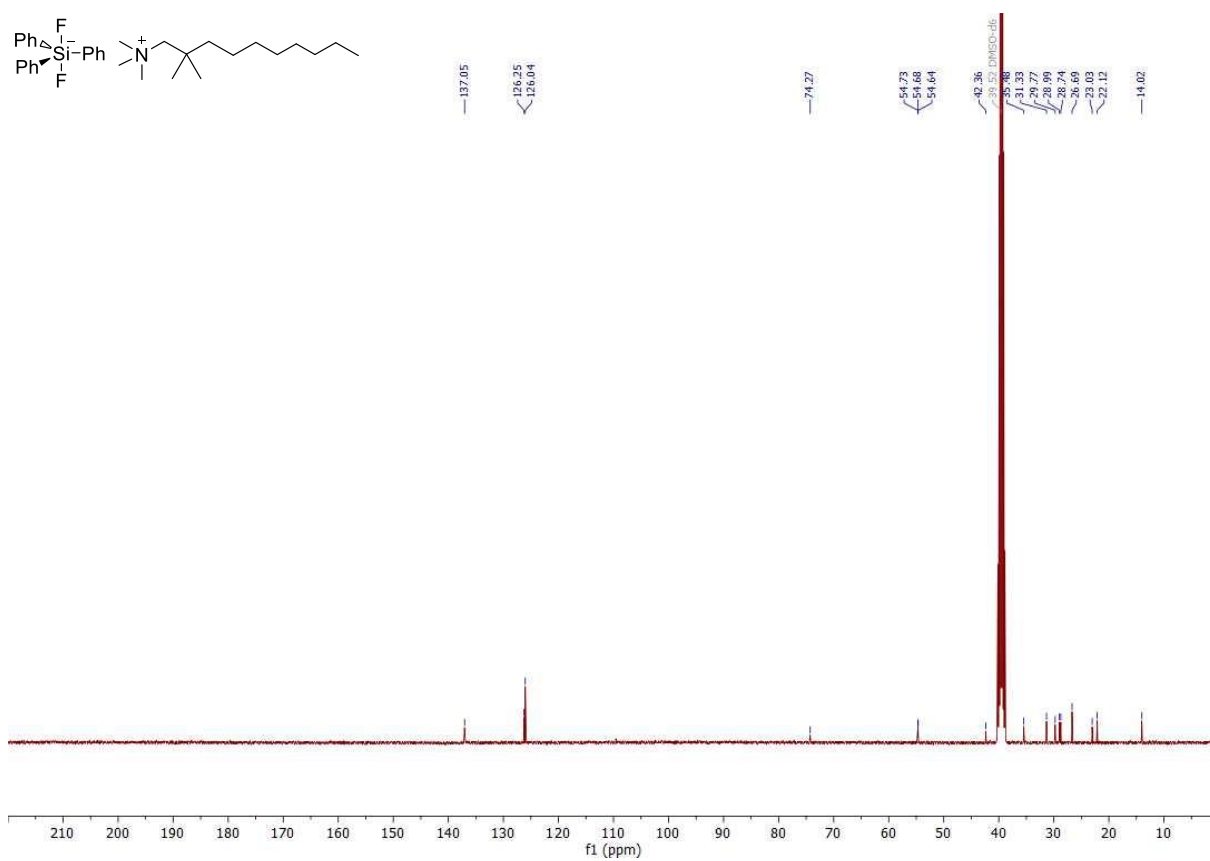

**Figure S36:**  $^{13}\text{C}$  NMR spectrum of **7d** in  $\text{DMSO-}d_6$

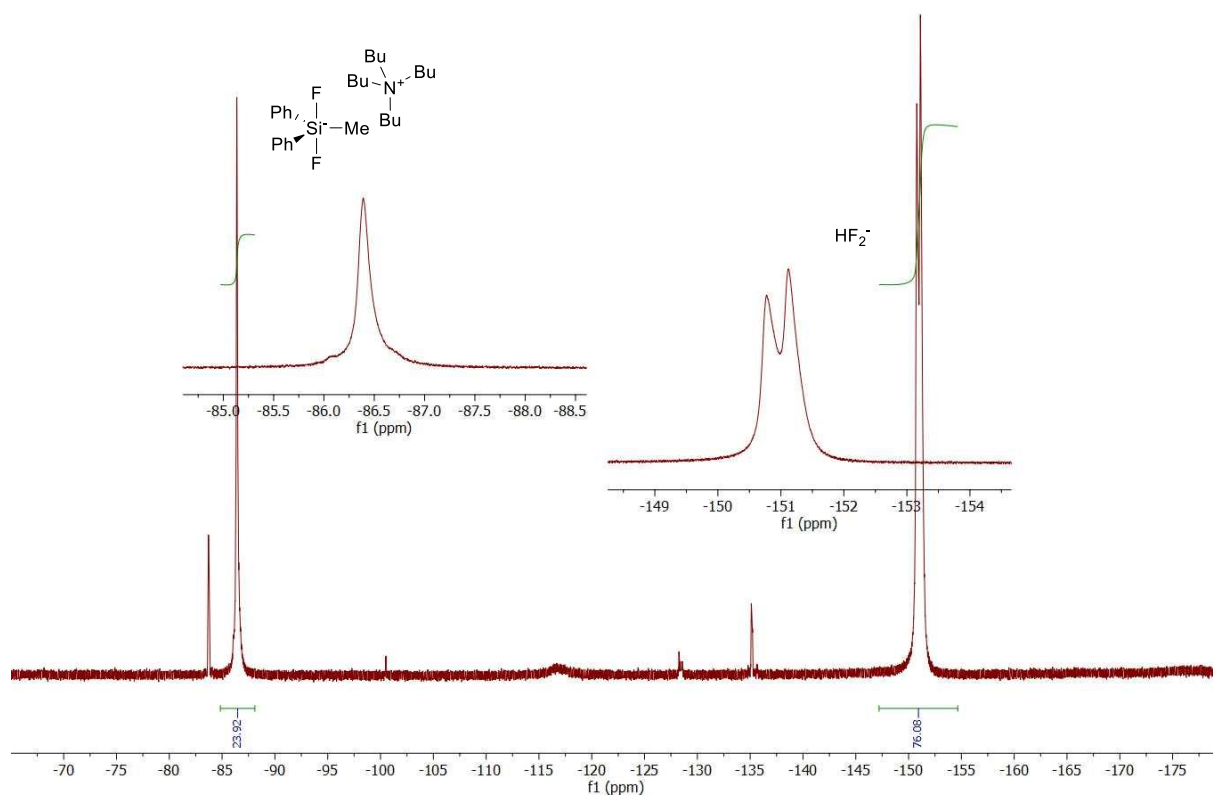

**Figure S37:** Low temperature ( $40^\circ\text{C}$ )  $^{19}\text{F}$  NMR spectra of attempted preparation of **16** in  $\text{CD}_3\text{CN}$

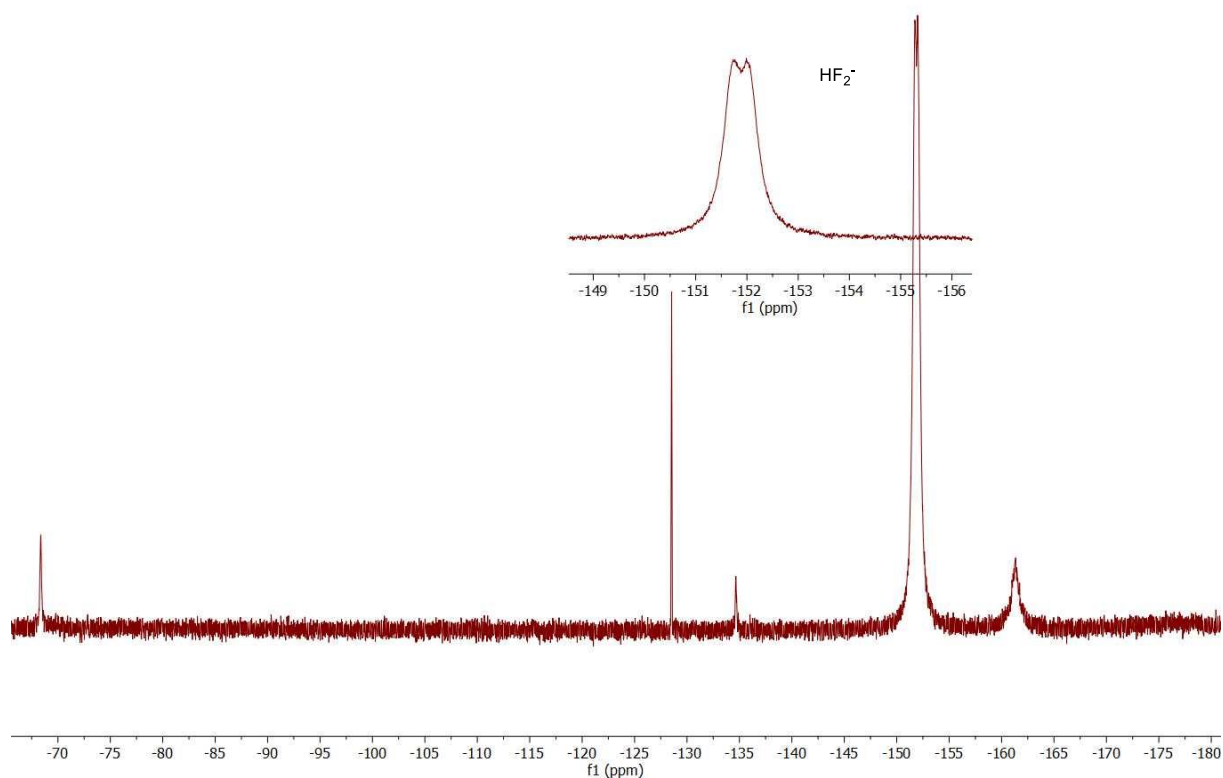

**Figure S38:** : Low temperature (40 °C)  $^{19}\text{F}$  NMR spectra of attempted preparation of **16** in  $\text{CD}_3\text{CN}$

### 3. Crystallographic data of **7b**

A prismatic colourless single-crystal of **7b**, approximate dimensions 0.042 mm x 0.093 mm x 0.230 mm, was used for the X-ray crystallographic analysis. The X-ray intensity data were collected on a Bruker D8 VENTURE system equipped with charge-integrating pixel array detector Photon II 7, a multilayer monochromator and a  $\text{CuK}\alpha$  Incoatec microfocus sealed tube ( $\lambda = 1.54178 \text{ \AA}$ ) using combined  $\varphi$  and  $\omega$  scans at 180 K. A total of 1343 frames were collected. The total exposure time was 3.36 hours. The frames were integrated with the Bruker SAINT software package using a wide-frame algorithm. The integration of the data using an orthorhombic unit cell yielded a total of 68911 reflections to a maximum  $\vartheta$  angle of  $70.08^\circ$  ( $0.82 \text{ \AA}$  resolution). The final cell constants of  $a = 15.2943(3) \text{ \AA}$ ,  $b = 15.8356(3) \text{ \AA}$ ,  $c = 19.9358(4) \text{ \AA}$ ,  $V = 4828.35(18) \text{ \AA}^3$ , are based upon the refinement of the XYZ-centroids of 9767 reflections above  $20 \sigma(I)$  with  $7.129^\circ < 2\vartheta < 140.1^\circ$ . Data were corrected for absorption effects using the Multi-Scan method (SADABS). The ratio of minimum to maximum apparent transmission was 0.858.

The positional and anisotropical thermal parameters of all non-hydrogen atoms were refined. All hydrogen atoms were located in a difference map, but repositioned geometrically, then they were initially refined with soft restraints on the bond lengths and angles to regularise their geometry (C-H in the range of  $0.93\text{-}0.98 \text{ \AA}$ ) and  $U_{iso}(\text{H})$  (in the range 1.2-1.5 times  $U_{eq}$  of the parent atom), after which the positions of the hydrogen atoms were refined with riding constraints. The refinement of 289 parameters on all 4589 reflections (3796 observed reflections,  $I > 2 \sigma(I)$ ) converged to the final  $R_1$  of 0.0389 and  $R_{w1}$  of 0.0943.

Data collection: APEX4<sup>7</sup>; Unit Cell refinement and data reduction: SAINT<sup>7</sup>; program used to solve structure: SIR92<sup>8</sup> ; program used to refine structure: CRYSTALS<sup>9</sup>. CCDC 2307603 contains the

supplementary crystallographic data for this paper. These data can be obtained free of charge from The Cambridge Crystallographic Data Centre via [www.ccdc.cam.ac.uk/structures](http://www.ccdc.cam.ac.uk/structures).

#### 4. XYZ files of computed structures (energies in kJ/mol)

##### Preliminary computations using Gaussian 16, method SMD-M06L/def2-SVPD

20:  $\Delta G = -2160706.30$  kJ/mol

|    |          |          |          |
|----|----------|----------|----------|
| N  | -2.73352 | -0.02139 | 0.00077  |
| C  | -4.15756 | -0.42872 | 0.15696  |
| H  | -4.24875 | -1.05283 | 1.04976  |
| H  | -4.77117 | 0.46984  | 0.26102  |
| H  | -4.46088 | -0.99177 | -0.72960 |
| C  | -2.58281 | 0.83470  | -1.21258 |
| H  | -1.53164 | 1.12409  | -1.29648 |
| H  | -2.89640 | 0.25886  | -2.08737 |
| H  | -3.21582 | 1.71838  | -1.09638 |
| C  | -1.87662 | -1.23329 | -0.14669 |
| H  | -0.84069 | -0.90322 | -0.25020 |
| H  | -1.99570 | -1.85825 | 0.74218  |
| H  | -2.19381 | -1.78007 | -1.03869 |
| C  | -2.29286 | 0.74755  | 1.20225  |
| H  | -2.38702 | 0.10452  | 2.08151  |
| H  | -1.25208 | 1.04707  | 1.04923  |
| H  | -2.93486 | 1.62589  | 1.30820  |
| F  | 0.55553  | 1.10220  | -0.33988 |
| Si | 2.00420  | 0.00400  | 0.00465  |
| C  | 3.14195  | 1.48053  | -0.32538 |
| H  | 2.91730  | 2.29966  | 0.37500  |
| H  | 4.21281  | 1.25377  | -0.24288 |
| H  | 2.95956  | 1.88559  | -1.33252 |
| C  | 1.31731  | -0.26282 | 1.75451  |
| H  | 0.44069  | -0.92971 | 1.73933  |
| H  | 2.04548  | -0.70940 | 2.44429  |
| H  | 0.97386  | 0.68689  | 2.19028  |
| C  | 1.50770  | -1.12860 | -1.43732 |
| H  | 2.36597  | -1.28013 | -2.10877 |
| H  | 1.23647  | -2.13110 | -1.06987 |
| H  | 0.67066  | -0.75492 | -2.04231 |
| F  | 3.40438  | -1.10726 | 0.34359  |

20-TS:  $\Delta G = -2160671.41$  kJ/mol

|   |         |          |          |
|---|---------|----------|----------|
| N | 2.79981 | -0.17822 | 0.00283  |
| C | 3.91736 | -1.15913 | 0.03145  |
| H | 3.60588 | -2.06388 | -0.49745 |
| H | 4.78856 | -0.71769 | -0.45989 |
| H | 4.15219 | -1.39473 | 1.07293  |
| C | 3.20055 | 1.07712  | 0.70330  |

|    |          |          |          |
|----|----------|----------|----------|
| H  | 2.33887  | 1.75384  | 0.67434  |
| H  | 3.47111  | 0.83054  | 1.73369  |
| H  | 4.05958  | 1.50934  | 0.18253  |
| C  | 1.59655  | -0.74545 | 0.68323  |
| H  | 0.80439  | 0.00982  | 0.59976  |
| H  | 1.32195  | -1.67784 | 0.18191  |
| H  | 1.85036  | -0.94304 | 1.72884  |
| C  | 2.44137  | 0.15172  | -1.40789 |
| H  | 2.10951  | -0.76327 | -1.90680 |
| H  | 1.63662  | 0.89502  | -1.37091 |
| H  | 3.32704  | 0.55269  | -1.90797 |
| F  | 0.20619  | 1.92600  | 0.01455  |
| Si | -2.41441 | -0.19295 | -0.00579 |
| C  | -3.16391 | 1.48440  | -0.28481 |
| H  | -3.65632 | 1.55889  | -1.26492 |
| H  | -3.90799 | 1.73463  | 0.48484  |
| H  | -2.37088 | 2.24367  | -0.24758 |
| C  | -1.27616 | -0.71335 | -1.37951 |
| H  | -0.85251 | -1.71549 | -1.22416 |
| H  | -1.79651 | -0.71567 | -2.34782 |
| H  | -0.44997 | 0.00686  | -1.44294 |
| C  | -1.72197 | -0.39040 | 1.71060  |
| H  | -2.51986 | -0.30730 | 2.46230  |
| H  | -1.22517 | -1.35967 | 1.85900  |
| H  | -0.98947 | 0.40025  | 1.92062  |
| F  | -3.70140 | -1.27240 | -0.07092 |

**24:**  $\Delta G = -2160675.40$  kJ/mol

|    |          |          |          |
|----|----------|----------|----------|
| N  | 2.84481  | -0.25314 | -0.00373 |
| C  | 3.82642  | -1.36950 | -0.05898 |
| H  | 3.38100  | -2.20390 | -0.60734 |
| H  | 4.72749  | -1.02159 | -0.57112 |
| H  | 4.06837  | -1.67706 | 0.96192  |
| C  | 3.42952  | 0.90500  | 0.73391  |
| H  | 2.67113  | 1.69626  | 0.75115  |
| H  | 3.68247  | 0.58057  | 1.74721  |
| H  | 4.33059  | 1.23355  | 0.20846  |
| C  | 1.60228  | -0.69540 | 0.69721  |
| H  | 0.91781  | 0.16121  | 0.70153  |
| H  | 1.18149  | -1.54435 | 0.15143  |
| H  | 1.86459  | -0.99779 | 1.71503  |
| C  | 2.48697  | 0.18418  | -1.38578 |
| H  | 2.04601  | -0.66440 | -1.91640 |
| H  | 1.77090  | 1.00859  | -1.28783 |
| H  | 3.39894  | 0.51096  | -1.89275 |
| F  | 0.61484  | 2.22194  | 0.11953  |
| Si | -2.55396 | -0.19786 | -0.02650 |
| C  | -3.44514 | 1.42863  | 0.10205  |

|   |          |          |          |
|---|----------|----------|----------|
| H | -3.89754 | 1.73104  | -0.85287 |
| H | -4.24038 | 1.40798  | 0.86048  |
| H | -2.73700 | 2.21904  | 0.39196  |
| C | -1.26727 | -0.18308 | -1.36425 |
| H | -0.76607 | -1.15466 | -1.47714 |
| H | -1.68543 | 0.09812  | -2.34084 |
| H | -0.50784 | 0.56930  | -1.09498 |
| C | -1.87010 | -0.74191 | 1.61651  |
| H | -2.66336 | -0.84920 | 2.36952  |
| H | -1.33543 | -1.70020 | 1.55557  |
| H | -1.16266 | 0.00868  | 1.99883  |
| F | -3.70144 | -1.33723 | -0.45494 |

**21:**  $\Delta G = -2663704.91$  kJ/mol

|    |          |          |          |
|----|----------|----------|----------|
| Si | 1.77399  | -1.09754 | 0.02053  |
| C  | 2.79561  | -1.86551 | 1.41572  |
| H  | 3.30744  | -1.07541 | 1.98749  |
| H  | 2.20174  | -2.45319 | 2.12697  |
| H  | 3.58998  | -2.51091 | 1.01364  |
| C  | 1.11718  | -2.13923 | -1.41911 |
| H  | 0.77584  | -3.12312 | -1.06446 |
| H  | 0.23595  | -1.65602 | -1.86929 |
| H  | 1.84929  | -2.30220 | -2.22027 |
| C  | 1.31513  | 0.75831  | 0.05967  |
| C  | 0.83061  | 1.38113  | 1.22185  |
| C  | 1.39276  | 1.54374  | -1.10284 |
| C  | 0.44456  | 2.72282  | 1.22894  |
| H  | 0.74413  | 0.80097  | 2.14478  |
| C  | 0.98413  | 2.87855  | -1.11564 |
| H  | 1.76824  | 1.09666  | -2.02760 |
| C  | 0.51142  | 3.47476  | 0.05465  |
| H  | 0.08067  | 3.18248  | 2.15128  |
| H  | 1.03693  | 3.45860  | -2.04019 |
| H  | 0.19613  | 4.52038  | 0.05168  |
| F  | 0.22063  | -1.44057 | 0.93324  |
| F  | 3.29283  | -0.69486 | -0.87356 |
| N  | -2.99514 | -0.41465 | -0.07399 |
| C  | -2.70061 | 0.01728  | 1.32461  |
| H  | -2.83440 | 1.10034  | 1.39189  |
| H  | -3.39608 | -0.49038 | 1.99839  |
| H  | -1.66896 | -0.26240 | 1.55676  |
| C  | -2.05725 | 0.27490  | -1.00648 |
| H  | -2.27443 | -0.04995 | -2.02747 |
| H  | -2.20313 | 1.35453  | -0.91437 |
| H  | -1.03739 | 0.00221  | -0.72457 |
| C  | -4.39981 | -0.06565 | -0.42523 |
| H  | -4.59594 | -0.39075 | -1.45043 |
| H  | -5.07255 | -0.57705 | 0.26826  |



|   |          |          |          |
|---|----------|----------|----------|
| H | -4.52438 | 1.01723  | -0.34283 |
| C | -2.80066 | -1.89056 | -0.18426 |
| H | -1.76945 | -2.12073 | 0.09748  |
| H | -3.50293 | -2.38543 | 0.49185  |
| H | -2.99631 | -2.19214 | -1.21678 |

**21-TS:**  $\Delta G = -2663656.50$  kJ/mol

|    |          |          |          |
|----|----------|----------|----------|
| Si | 2.23729  | -0.86104 | -0.16014 |
| C  | 2.84630  | -1.60236 | 1.42694  |
| H  | 1.99780  | -1.93911 | 2.03433  |
| H  | 3.49572  | -2.46739 | 1.23241  |
| H  | 3.42834  | -0.87550 | 2.01129  |
| C  | 1.37060  | -2.00256 | -1.34502 |
| H  | 2.02374  | -2.84118 | -1.62588 |
| H  | 0.46028  | -2.41188 | -0.89146 |
| H  | 1.09394  | -1.47701 | -2.27053 |
| C  | 1.39253  | 0.80417  | 0.04422  |
| C  | 0.86208  | 1.23572  | 1.27026  |
| C  | 1.26177  | 1.65555  | -1.06670 |
| C  | 0.20987  | 2.46395  | 1.38048  |
| H  | 0.94697  | 0.59645  | 2.15222  |
| C  | 0.61387  | 2.88623  | -0.96172 |
| H  | 1.66559  | 1.35289  | -2.03746 |
| C  | 0.08213  | 3.29091  | 0.26335  |
| H  | -0.20110 | 2.77805  | 2.34225  |
| H  | 0.52042  | 3.53048  | -1.83839 |
| H  | -0.43048 | 4.25122  | 0.34792  |
| F  | -0.32834 | -1.79971 | 1.34295  |
| F  | 3.63702  | -0.45092 | -1.00213 |
| N  | -2.98545 | -0.47505 | -0.19955 |
| C  | -2.92057 | -0.01073 | 1.21802  |
| H  | -2.86985 | 1.08175  | 1.22334  |
| H  | -3.82423 | -0.34614 | 1.73461  |
| H  | -2.02274 | -0.45624 | 1.66304  |
| C  | -1.73402 | -0.05447 | -0.89733 |
| H  | -1.78783 | -0.38102 | -1.94003 |
| H  | -1.65790 | 1.03543  | -0.84582 |
| H  | -0.90275 | -0.53520 | -0.37068 |
| C  | -4.17163 | 0.11415  | -0.87534 |
| H  | -4.20582 | -0.24620 | -1.90701 |
| H  | -5.07335 | -0.19365 | -0.33914 |
| H  | -4.07930 | 1.20358  | -0.86097 |
| C  | -3.06739 | -1.96542 | -0.21946 |
| H  | -2.18080 | -2.34445 | 0.30294  |
| H  | -3.98611 | -2.27103 | 0.28902  |
| H  | -3.08573 | -2.29895 | -1.26076 |

**25:**  $\Delta G = -2663659.32$  kJ/mol

|    |          |          |          |
|----|----------|----------|----------|
| Si | 2.49825  | -0.73500 | -0.21983 |
| C  | 3.03170  | -1.54455 | 1.36100  |
| H  | 2.16383  | -1.96198 | 1.89114  |
| H  | 3.72322  | -2.37558 | 1.16619  |
| H  | 3.53178  | -0.84191 | 2.04169  |
| C  | 1.65200  | -1.89825 | -1.39603 |
| H  | 2.31467  | -2.72702 | -1.68224 |
| H  | 0.75941  | -2.33921 | -0.92964 |
| H  | 1.33207  | -1.39040 | -2.31682 |
| C  | 1.48755  | 0.81348  | 0.08488  |
| C  | 0.84380  | 1.03138  | 1.31450  |
| C  | 1.30617  | 1.76456  | -0.93481 |
| C  | 0.04036  | 2.15354  | 1.51689  |
| H  | 0.96374  | 0.31212  | 2.12896  |
| C  | 0.51179  | 2.89254  | -0.73333 |
| H  | 1.78845  | 1.62340  | -1.90655 |
| C  | -0.12655 | 3.08650  | 0.49299  |
| H  | -0.45659 | 2.30132  | 2.47766  |
| H  | 0.38515  | 3.62077  | -1.53681 |
| H  | -0.75448 | 3.96582  | 0.64989  |
| F  | -0.88810 | -2.16809 | 1.53395  |
| F  | 3.87106  | -0.21644 | -1.01238 |
| N  | -3.03187 | -0.41955 | -0.32727 |
| C  | -3.09385 | 0.02164  | 1.09777  |
| H  | -2.85263 | 1.08738  | 1.14169  |
| H  | -4.10808 | -0.14830 | 1.46944  |
| H  | -2.36277 | -0.57806 | 1.65366  |
| C  | -1.63823 | -0.22844 | -0.83007 |
| H  | -1.59605 | -0.56079 | -1.87130 |
| H  | -1.39099 | 0.83464  | -0.76334 |
| H  | -0.98380 | -0.83258 | -0.19117 |
| C  | -3.98236 | 0.37665  | -1.14827 |
| H  | -3.92372 | 0.03699  | -2.18585 |
| H  | -4.99415 | 0.22971  | -0.76107 |
| H  | -3.70437 | 1.43231  | -1.08288 |
| C  | -3.37731 | -1.86905 | -0.40256 |
| H  | -2.65692 | -2.40755 | 0.22397  |
| H  | -4.39797 | -2.00413 | -0.03411 |
| H  | -3.30930 | -2.18939 | -1.44587 |

**22:**  $\Delta G = -3166699.80$  kJ/mol

|    |          |          |          |
|----|----------|----------|----------|
| Si | 0.04677  | -1.79876 | -0.59854 |
| C  | 0.10142  | -3.04913 | -2.01406 |
| H  | 1.01160  | -2.90092 | -2.61478 |
| H  | 0.07680  | -4.09648 | -1.68899 |
| H  | -0.74292 | -2.88259 | -2.69984 |
| C  | -1.62711 | -1.14592 | 0.06214  |

|   |          |          |          |
|---|----------|----------|----------|
| C | -1.96487 | -1.22504 | 1.42518  |
| C | -2.55411 | -0.51606 | -0.78739 |
| C | -3.14408 | -0.66882 | 1.92415  |
| H | -1.28436 | -1.72605 | 2.11606  |
| C | -3.75027 | 0.01646  | -0.30421 |
| H | -2.33018 | -0.43090 | -1.85264 |
| C | -4.04400 | -0.04628 | 1.05865  |
| H | -3.36514 | -0.72740 | 2.99245  |
| H | -4.45286 | 0.49261  | -0.99245 |
| H | -4.97053 | 0.38521  | 1.44346  |
| F | 0.07227  | -3.07884 | 0.65641  |
| F | 0.06796  | -0.45835 | -1.83503 |
| C | 1.65106  | -1.05811 | 0.12536  |
| C | 1.74248  | -0.69555 | 1.47910  |
| C | 2.77422  | -0.81417 | -0.68278 |
| C | 2.88816  | -0.08941 | 1.99890  |
| H | 0.89593  | -0.87996 | 2.14671  |
| C | 3.93598  | -0.23864 | -0.16636 |
| H | 2.74078  | -1.06970 | -1.74571 |
| C | 3.99323  | 0.13630  | 1.17732  |
| H | 2.92243  | 0.20149  | 3.05138  |
| H | 4.79783  | -0.07081 | -0.81666 |
| H | 4.89444  | 0.60188  | 1.58168  |
| N | -0.05017 | 2.94727  | -0.31686 |
| C | -0.97323 | 2.68752  | -1.46081 |
| H | -0.63191 | 3.27109  | -2.32012 |
| H | -0.93978 | 1.61781  | -1.68939 |
| H | -1.98262 | 2.99397  | -1.17352 |
| C | -0.50982 | 2.17496  | 0.87306  |
| H | -0.50092 | 1.11221  | 0.61605  |
| H | 0.17280  | 2.37131  | 1.70425  |
| H | -1.52334 | 2.49478  | 1.13015  |
| C | -0.03853 | 4.40196  | 0.00283  |
| H | 0.64293  | 4.57339  | 0.84012  |
| H | 0.30162  | 4.95152  | -0.87870 |
| H | -1.05186 | 4.71138  | 0.27194  |
| C | 1.32413  | 2.49831  | -0.69073 |
| H | 1.65570  | 3.07639  | -1.55731 |
| H | 1.99243  | 2.67246  | 0.15689  |
| H | 1.27768  | 1.43352  | -0.93791 |

**22-TS:**  $\Delta G = -3166640.15$  kJ/mol

|    |         |          |          |
|----|---------|----------|----------|
| Si | 2.31036 | -0.00424 | 0.51127  |
| C  | 2.52392 | -0.03495 | 2.34827  |
| H  | 3.08907 | -0.91450 | 2.68335  |
| H  | 3.03514 | 0.86363  | 2.71758  |
| H  | 1.53160 | -0.07422 | 2.82411  |
| C  | 1.42873 | 1.53964  | -0.07920 |

|   |           |          |          |
|---|-----------|----------|----------|
| C | 1.43923   | 1.90439  | -1.43725 |
| C | 0.65586   | 2.30831  | 0.80759  |
| C | 0.69444   | 2.99033  | -1.89448 |
| H | 2.03406   | 1.33192  | -2.15417 |
| C | -0.09241  | 3.39379  | 0.35229  |
| H | 0.62580   | 2.05135  | 1.86935  |
| C | -0.07760  | 3.73447  | -1.00032 |
| H | 0.71399   | 3.25667  | -2.95306 |
| H | -0.69093  | 3.97510  | 1.05633  |
| H | -0.66607  | 4.58145  | -1.35863 |
| F | 3.78698   | 0.01014  | -0.25018 |
| F | -1.15304  | -0.15905 | 2.69606  |
| C | 1.42859   | -1.52924 | -0.12865 |
| C | 1.35634   | -1.79974 | -1.50681 |
| C | 0.73521   | -2.37874 | 0.74904  |
| C | 0.61172   | -2.87459 | -1.98964 |
| H | 1.88536   | -1.16103 | -2.21946 |
| C | -0.01903  | -3.44942 | 0.26882  |
| H | 0.76918   | -2.19625 | 1.82561  |
| C | -0.08417  | -3.69776 | -1.10207 |
| H | 0.56844   | -3.06866 | -3.06308 |
| H | -0.55847  | -4.09129 | 0.96815  |
| H | -0.67602  | -4.53381 | -1.48000 |
| N | -3.06164  | 0.01716  | -0.05908 |
| C | -3.26580  | 1.22899  | 0.78873  |
| H | -4.31103  | 1.25802  | 1.10842  |
| H | -2.59344  | 1.14007  | 1.65057  |
| H | -3.03217  | 2.11381  | 0.19010  |
| C | -1.62923  | -0.03815 | -0.47919 |
| H | -1.03274  | -0.07547 | 0.43838  |
| H | -1.47956  | -0.93560 | -1.08661 |
| H | -1.40487  | 0.85804  | -1.06506 |
| C | -3.94148  | 0.07851  | -1.25677 |
| H | -3.77515  | -0.81606 | -1.86319 |
| H | -4.98339  | 0.12212  | -0.92831 |
| H | -3.69076  | 0.97420  | -1.83187 |
| C | -3.637259 | -1.20084 | 0.74656  |
| H | -4.41867  | -1.15148 | 1.06121  |
| H | -3.21062  | -2.08215 | 0.11956  |
| H | -2.69806  | -1.19636 | 1.61202  |

**26:**  $\Delta G = -3166642.47$  kJ/mol

|    |          |          |          |
|----|----------|----------|----------|
| Si | -2.38500 | -0.09493 | 0.38444  |
| C  | -2.85928 | -0.10252 | 2.17312  |
| H  | -3.48218 | 0.76400  | 2.43164  |
| H  | -3.41132 | -1.01297 | 2.44140  |
| H  | -1.96058 | -0.06323 | 2.80585  |
| C  | -1.36777 | -1.59033 | -0.10268 |

|   |          |          |          |
|---|----------|----------|----------|
| C | -1.23548 | -1.96369 | -1.45177 |
| C | -0.63629 | -2.30805 | 0.85861  |
| C | -0.39564 | -3.01095 | -1.82773 |
| H | -1.79242 | -1.42841 | -2.22562 |
| C | 0.21065  | -3.35121 | 0.48475  |
| H | -0.71657 | -2.04428 | 1.91587  |
| C | 0.33429  | -3.70300 | -0.85952 |
| H | -0.30641 | -3.28647 | -2.88032 |
| H | 0.77685  | -3.89114 | 1.24618  |
| H | 0.99844  | -4.51819 | -1.15362 |
| F | -3.74659 | -0.16329 | -0.56444 |
| F | 1.18309  | 0.13672  | 2.71817  |
| C | -1.50531 | 1.47814  | -0.12498 |
| C | -1.37765 | 1.82927  | -1.48063 |
| C | -0.86767 | 2.28564  | 0.83143  |
| C | -0.63182 | 2.94191  | -1.86661 |
| H | -1.86343 | 1.22496  | -2.25163 |
| C | -0.11134 | 3.39305  | 0.44786  |
| H | -0.94959 | 2.04241  | 1.89339  |
| C | 0.00954  | 3.72185  | -0.90235 |
| H | -0.54489 | 3.19932  | -2.92396 |
| H | 0.38495  | 4.00178  | 1.20625  |
| H | 0.60259  | 4.58746  | -1.20426 |
| N | 3.06133  | 0.09927  | -0.07996 |
| C | 3.36122  | -1.10079 | 0.75540  |
| H | 4.41716  | -1.07364 | 1.03784  |
| H | 2.71601  | -1.05138 | 1.64038  |
| H | 3.15400  | -1.99639 | 0.16307  |
| C | 1.61502  | 0.07692  | -0.45451 |
| H | 1.04301  | 0.08168  | 0.47963  |
| H | 1.40109  | 0.96439  | -1.05704 |
| H | 1.42243  | -0.83025 | -1.03476 |
| C | 3.90284  | 0.09039  | -1.30686 |
| H | 3.66311  | 0.97424  | -1.90442 |
| H | 4.95619  | 0.10814  | -1.01459 |
| H | 3.68546  | -0.81779 | -1.87597 |
| C | 3.33156  | 1.33098  | 0.71868  |
| H | 4.38763  | 1.33787  | 1.00191  |
| H | 3.10354  | 2.20315  | 0.09953  |
| H | 2.68597  | 1.29240  | 1.60418  |

**23:**  $\Delta G = -3669683.40$  kJ/mol

|    |          |          |          |
|----|----------|----------|----------|
| Si | 0.99200  | -0.05400 | 0.40500  |
| C  | 0.15100  | 1.63500  | 0.67400  |
| C  | -0.76800 | 1.83200  | 1.71700  |
| C  | 0.39400  | 2.71600  | -0.18900 |
| C  | -1.43900 | 3.04600  | 1.87700  |
| H  | -0.97500 | 1.01700  | 2.41700  |

|   |          |          |          |
|---|----------|----------|----------|
| C | -0.24900 | 3.94300  | -0.01800 |
| H | 1.09500  | 2.59700  | -1.02100 |
| C | -1.17700 | 4.10900  | 1.01200  |
| H | -2.16500 | 3.16600  | 2.68400  |
| H | -0.03300 | 4.77200  | -0.69600 |
| H | -1.69400 | 5.06300  | 1.13900  |
| F | 1.60400  | -0.01500 | 2.08100  |
| F | 0.36100  | -0.05800 | -1.28400 |
| C | 2.77200  | -0.12100 | -0.27200 |
| C | 3.77600  | 0.71900  | 0.23900  |
| C | 3.13400  | -1.01100 | -1.29700 |
| C | 5.08000  | 0.68200  | -0.25800 |
| H | 3.53600  | 1.42000  | 1.04300  |
| C | 4.44200  | -1.07600 | -1.77900 |
| H | 2.37700  | -1.67000 | -1.73100 |
| C | 5.42000  | -0.22300 | -1.26500 |
| H | 5.83700  | 1.35700  | 0.14700  |
| H | 4.70000  | -1.78900 | -2.56500 |
| H | 6.44200  | -0.26200 | -1.64800 |
| C | 0.01200  | -1.65600 | 0.77000  |
| C | -0.28500 | -2.58900 | -0.23900 |
| C | -0.50000 | -1.91900 | 2.05400  |
| C | -1.05700 | -3.72400 | 0.01600  |
| H | 0.08500  | -2.42000 | -1.25100 |
| C | -1.29800 | -3.03500 | 2.31100  |
| H | -0.27700 | -1.22900 | 2.87000  |
| C | -1.57800 | -3.94500 | 1.29100  |
| H | -1.26400 | -4.43400 | -0.78900 |
| H | -1.69900 | -3.19800 | 3.31400  |
| H | -2.19700 | -4.82200 | 1.49000  |
| N | -3.40800 | 0.12900  | -1.35200 |
| C | -2.75100 | -0.87600 | -2.23900 |
| H | -3.22300 | -1.84900 | -2.07500 |
| H | -2.88500 | -0.56300 | -3.27800 |
| H | -1.68700 | -0.91200 | -1.98700 |
| C | -2.75500 | 1.45600  | -1.55000 |
| H | -2.88700 | 1.75900  | -2.59200 |
| H | -3.22900 | 2.18200  | -0.88300 |
| H | -1.69100 | 1.35300  | -1.31600 |
| C | -3.24800 | -0.29100 | 0.07000  |
| H | -3.73300 | 0.45000  | 0.71100  |
| H | -3.71500 | -1.27100 | 0.20200  |
| H | -2.17900 | -0.34700 | 0.29400  |
| C | -4.85600 | 0.22600  | -1.68500 |
| H | -4.95600 | 0.53500  | -2.72900 |
| H | -5.31800 | -0.75400 | -1.53600 |
| H | -5.31900 | 0.96600  | -1.02700 |

**23-TS:**  $\Delta G = -3669616.64$  kJ/mol

|    |          |          |          |
|----|----------|----------|----------|
| Si | -1.32000 | 0.05200  | 1.06800  |
| C  | -0.23200 | -1.46700 | 1.19400  |
| C  | 0.48000  | -1.69600 | 2.38500  |
| C  | -0.03900 | -2.35500 | 0.12300  |
| C  | 1.36000  | -2.77100 | 2.49900  |
| H  | 0.35400  | -1.02400 | 3.23700  |
| C  | 0.83800  | -3.43300 | 0.23700  |
| H  | -0.55200 | -2.17500 | -0.82300 |
| C  | 1.54100  | -3.64200 | 1.42400  |
| H  | 1.90800  | -2.93100 | 3.43000  |
| H  | 0.97700  | -4.11100 | -0.60800 |
| H  | 2.23200  | -4.48300 | 1.51000  |
| F  | -2.04800 | 0.12300  | 2.56500  |
| F  | 0.07300  | -0.21200 | -2.20100 |
| C  | -2.67500 | -0.08900 | -0.20800 |
| C  | -3.26500 | -1.33300 | -0.49400 |
| C  | -3.15600 | 1.04200  | -0.88900 |
| C  | -4.29300 | -1.44300 | -1.42900 |
| H  | -2.92200 | -2.23400 | 0.02000  |
| C  | -4.18400 | 0.93500  | -1.82400 |
| H  | -2.72600 | 2.02600  | -0.68800 |
| C  | -4.75100 | -0.30900 | -2.10000 |
| H  | -4.73700 | -2.41900 | -1.63700 |
| H  | -4.54200 | 1.82600  | -2.34300 |
| H  | -5.55400 | -0.39500 | -2.83500 |
| C  | -0.36100 | 1.65900  | 0.98300  |
| C  | 0.02300  | 2.23100  | -0.24300 |
| C  | 0.03000  | 2.30200  | 2.17100  |
| C  | 0.77100  | 3.40700  | -0.27700 |
| H  | -0.22600 | 1.71000  | -1.17200 |
| C  | 0.78700  | 3.47300  | 2.13500  |
| H  | -0.25700 | 1.88600  | 3.13900  |
| C  | 1.15600  | 4.03000  | 0.91100  |
| H  | 1.06000  | 3.83800  | -1.23800 |
| H  | 1.08500  | 3.95600  | 3.06800  |
| H  | 1.74500  | 4.94900  | 0.88300  |
| N  | 3.36600  | -0.08300 | -1.43500 |
| C  | 2.98600  | 1.09900  | -2.26400 |
| H  | 3.22900  | 2.00700  | -1.70500 |
| H  | 3.55800  | 1.06900  | -3.19500 |
| H  | 1.91000  | 1.02600  | -2.46100 |
| C  | 3.03400  | -1.33100 | -2.18400 |
| H  | 3.60300  | -1.33700 | -3.11800 |
| H  | 3.31500  | -2.19000 | -1.56900 |
| H  | 1.95500  | -1.31500 | -2.38000 |
| C  | 2.56900  | -0.05800 | -0.17300 |
| H  | 2.83200  | -0.93800 | 0.42200  |

|   |         |          |          |
|---|---------|----------|----------|
| H | 2.81100 | 0.85600  | 0.37700  |
| H | 1.51500 | -0.07800 | -0.46900 |
| C | 4.82000 | -0.04500 | -1.12400 |
| H | 5.38300 | -0.06400 | -2.06000 |
| H | 5.03900 | 0.87300  | -0.57200 |
| H | 5.07200 | -0.91800 | -0.51500 |

**25:**  $\Delta G = -3669619.49$  kJ/mol

|    |          |          |          |
|----|----------|----------|----------|
| Si | 1.53600  | -0.00000 | 1.06800  |
| C  | 0.50100  | 1.53700  | 0.83300  |
| C  | -0.14000 | 2.16400  | 1.91400  |
| C  | 0.24700  | 2.02000  | -0.46300 |
| C  | -1.00900 | 3.23500  | 1.70700  |
| H  | 0.03400  | 1.80800  | 2.93300  |
| C  | -0.62700 | 3.08500  | -0.67300 |
| H  | 0.72600  | 1.54900  | -1.32600 |
| C  | -1.25600 | 3.69400  | 0.41300  |
| H  | -1.49800 | 3.71200  | 2.55900  |
| H  | -0.81900 | 3.43800  | -1.68800 |
| H  | -1.94300 | 4.52700  | 0.25000  |
| F  | 2.00000  | -0.00000 | 2.65800  |
| F  | -1.45100 | 0.00000  | -2.92700 |
| C  | 3.03900  | -0.00100 | -0.04000 |
| C  | 3.62500  | 1.20600  | -0.46100 |
| C  | 3.62300  | -1.20800 | -0.46300 |
| C  | 4.75800  | 1.20700  | -1.27200 |
| H  | 3.19200  | 2.16100  | -0.15200 |
| C  | 4.75600  | -1.20900 | -1.27500 |
| H  | 3.18800  | -2.16200 | -0.15700 |
| C  | 5.32400  | -0.00100 | -1.68200 |
| H  | 5.20000  | 2.15300  | -1.59000 |
| H  | 5.19500  | -2.15500 | -1.59500 |
| H  | 6.20900  | -0.00100 | -2.32100 |
| C  | 0.50000  | -1.53700 | 0.83300  |
| C  | 0.24400  | -2.01900 | -0.46300 |
| C  | -0.14000 | -2.16400 | 1.91500  |
| C  | -0.63000 | -3.08300 | -0.67300 |
| H  | 0.72200  | -1.54700 | -1.32600 |
| C  | -1.01000 | -3.23500 | 1.70800  |
| H  | 0.03500  | -1.80900 | 2.93300  |
| C  | -1.25900 | -3.69300 | 0.41400  |
| H  | -0.82400 | -3.43500 | -1.68800 |
| H  | -1.49800 | -3.71100 | 2.56000  |
| H  | -1.94600 | -4.52600 | 0.25100  |
| N  | -3.86200 | 0.00000  | -0.59400 |
| C  | -3.98100 | -1.21500 | -1.45200 |
| H  | -3.88200 | -2.10000 | -0.81700 |
| H  | -4.96300 | -1.20600 | -1.93300 |



|   |          |          |          |
|---|----------|----------|----------|
| H | -3.17700 | -1.16600 | -2.19600 |
| C | -3.98200 | 1.21500  | -1.45200 |
| H | -4.96400 | 1.20500  | -1.93300 |
| H | -3.88400 | 2.10000  | -0.81800 |
| H | -3.17800 | 1.16700  | -2.19600 |
| C | -2.51600 | 0.00100  | 0.05500  |
| H | -2.43200 | 0.90000  | 0.67400  |
| H | -2.43100 | -0.89600 | 0.67600  |
| H | -1.77500 | 0.00000  | -0.75200 |
| C | -4.92800 | 0.00000  | 0.44300  |
| H | -5.90300 | -0.00000 | -0.05200 |
| H | -4.81900 | -0.89600 | 1.06000  |
| H | -4.82000 | 0.89600  | 1.06000  |

### Computations using ORCA, method CPCM-M062X/ma-def2-TZVP

20:  $\Delta G = -2161220.33$  kJ/mol

|    |           |           |           |
|----|-----------|-----------|-----------|
| N  | 2.822200  | -0.273030 | 0.006510  |
| C  | 3.746330  | -1.437100 | -0.027180 |
| H  | 3.246890  | -2.258040 | -0.536470 |
| H  | 4.646070  | -1.147020 | -0.564550 |
| H  | 3.987610  | -1.715380 | 0.996040  |
| C  | 3.470240  | 0.877310  | 0.701300  |
| H  | 2.748760  | 1.693310  | 0.697700  |
| H  | 3.716240  | 0.566730  | 1.714350  |
| H  | 4.373760  | 1.139570  | 0.155480  |
| C  | 1.571820  | -0.633770 | 0.736870  |
| H  | 0.941520  | 0.255310  | 0.740040  |
| H  | 1.095930  | -1.458600 | 0.210260  |
| H  | 1.843250  | -0.934480 | 1.746880  |
| C  | 2.469820  | 0.138760  | -1.383470 |
| H  | 1.976540  | -0.698770 | -1.872120 |
| H  | 1.803770  | 0.996750  | -1.302540 |
| H  | 3.389000  | 0.395230  | -1.905520 |
| F  | 0.742860  | 2.282670  | 0.121670  |
| Si | -2.499950 | -0.202630 | -0.050500 |
| C  | -3.561490 | 1.313180  | 0.105040  |
| H  | -4.046500 | 1.549630  | -0.843700 |
| H  | -4.332460 | 1.177090  | 0.865500  |
| H  | -2.946040 | 2.168250  | 0.393990  |
| C  | -1.207100 | -0.012930 | -1.364160 |
| H  | -0.675520 | -0.952870 | -1.528980 |
| H  | -1.651270 | 0.307860  | -2.308360 |
| H  | -0.484770 | 0.741940  | -1.035800 |
| C  | -1.784780 | -0.700460 | 1.590590  |
| H  | -2.580050 | -0.891710 | 2.313740  |
| H  | -1.172450 | -1.600110 | 1.504050  |
| H  | -1.157270 | 0.102880  | 1.983720  |
| F  | -3.480940 | -1.415780 | -0.513550 |

**20-TS:**  $\Delta G = -2161186.36$  kJ/mol

|    |           |           |           |
|----|-----------|-----------|-----------|
| N  | 0.021728  | -0.027736 | 0.051190  |
| C  | 1.506369  | -0.046592 | -0.026187 |
| H  | 1.875477  | 0.951761  | 0.196960  |
| H  | 1.880553  | -0.761802 | 0.702850  |
| H  | 1.795405  | -0.342946 | -1.031830 |
| C  | -0.523319 | -1.384249 | -0.249249 |
| H  | -1.608149 | -1.311056 | -0.180088 |
| H  | -0.204316 | -1.663897 | -1.251012 |
| H  | -0.122759 | -2.081590 | 0.483313  |
| C  | -0.531848 | 0.942331  | -0.938051 |
| H  | -1.615934 | 0.913258  | -0.836002 |
| H  | -0.137564 | 1.929541  | -0.705479 |
| H  | -0.217140 | 0.632033  | -1.932447 |
| C  | -0.414707 | 0.378966  | 1.419347  |
| H  | -0.019465 | 1.372622  | 1.619712  |
| H  | -1.504632 | 0.374515  | 1.417985  |
| H  | -0.012356 | -0.338444 | 2.131308  |
| F  | -3.261890 | -0.007607 | 0.260695  |
| Si | -4.524551 | 1.942405  | -1.075566 |
| C  | -5.955783 | 1.169446  | -0.173003 |
| H  | -6.441812 | 1.917103  | 0.458556  |
| H  | -6.696466 | 0.809314  | -0.891171 |
| H  | -5.622196 | 0.339829  | 0.444461  |
| C  | -3.341182 | 2.945983  | -0.042980 |
| H  | -2.609547 | 3.441124  | -0.686712 |
| H  | -3.896534 | 3.723571  | 0.487333  |
| H  | -2.814177 | 2.325371  | 0.677269  |
| C  | -3.808302 | 0.964789  | -2.492208 |
| H  | -4.599088 | 0.746047  | -3.214068 |
| H  | -3.045429 | 1.555863  | -3.006000 |
| H  | -3.363034 | 0.032605  | -2.153402 |
| F  | -5.294959 | 3.153932  | -1.909117 |

**24:**  $\Delta G = -2161190.09$  kJ/mol

|   |          |           |           |
|---|----------|-----------|-----------|
| N | 2.822200 | -0.273030 | 0.006510  |
| C | 3.746330 | -1.437100 | -0.027180 |
| H | 3.246890 | -2.258040 | -0.536470 |
| H | 4.646070 | -1.147020 | -0.564550 |
| H | 3.987610 | -1.715380 | 0.996040  |
| C | 3.470240 | 0.877310  | 0.701300  |
| H | 2.748760 | 1.693310  | 0.697700  |
| H | 3.716240 | 0.566730  | 1.714350  |
| H | 4.373760 | 1.139570  | 0.155480  |
| C | 1.571820 | -0.633770 | 0.736870  |
| H | 0.941520 | 0.255310  | 0.740040  |
| H | 1.095930 | -1.458600 | 0.210260  |
| H | 1.843250 | -0.934480 | 1.746880  |

|    |           |           |           |
|----|-----------|-----------|-----------|
| C  | 2.469820  | 0.138760  | -1.383470 |
| H  | 1.976540  | -0.698770 | -1.872120 |
| H  | 1.803770  | 0.996750  | -1.302540 |
| H  | 3.389000  | 0.395230  | -1.905520 |
| F  | 0.742860  | 2.282670  | 0.121670  |
| Si | -2.499950 | -0.202630 | -0.050500 |
| C  | -3.561490 | 1.313180  | 0.105040  |
| H  | -4.046500 | 1.549630  | -0.843700 |
| H  | -4.332460 | 1.177090  | 0.865500  |
| H  | -2.946040 | 2.168250  | 0.393990  |
| C  | -1.207100 | -0.012930 | -1.364160 |
| H  | -0.675520 | -0.952870 | -1.528980 |
| H  | -1.651270 | 0.307860  | -2.308360 |
| H  | -0.484770 | 0.741940  | -1.035800 |
| C  | -1.784780 | -0.700460 | 1.590590  |
| H  | -2.580050 | -0.891710 | 2.313740  |
| H  | -1.172450 | -1.600110 | 1.504050  |
| H  | -1.157270 | 0.102880  | 1.983720  |
| F  | -3.480940 | -1.415780 | -0.513550 |

**21:**  $\Delta G = -2664490.67$  kJ/mol

|    |           |           |           |
|----|-----------|-----------|-----------|
| Si | 1.733520  | -1.102060 | -0.000680 |
| C  | 2.716620  | -1.831640 | 1.438720  |
| H  | 2.499190  | -1.267690 | 2.350090  |
| H  | 2.393250  | -2.859140 | 1.625690  |
| H  | 3.793770  | -1.829360 | 1.276530  |
| C  | 1.006090  | -2.180850 | -1.379100 |
| H  | 0.585920  | -3.099150 | -0.962470 |
| H  | 0.177390  | -1.646410 | -1.855870 |
| H  | 1.727630  | -2.439670 | -2.153580 |
| C  | 1.327010  | 0.765500  | 0.009950  |
| C  | 0.767800  | 1.388400  | 1.131780  |
| C  | 1.500460  | 1.554720  | -1.131620 |
| C  | 0.401390  | 2.729950  | 1.121290  |
| H  | 0.602560  | 0.806980  | 2.032190  |
| C  | 1.111420  | 2.891100  | -1.166390 |
| H  | 1.939690  | 1.113540  | -2.019720 |
| C  | 0.562160  | 3.484500  | -0.035970 |
| H  | -0.020050 | 3.185140  | 2.010030  |
| H  | 1.239740  | 3.470310  | -2.073230 |
| H  | 0.262920  | 4.525370  | -0.055520 |
| F  | 0.237160  | -1.378380 | 0.930760  |
| F  | 3.175990  | -0.798380 | -0.938130 |
| N  | -2.953170 | -0.417030 | -0.042490 |
| C  | -2.644390 | -0.061440 | 1.373500  |
| H  | -2.823030 | 1.003720  | 1.503390  |
| H  | -3.301880 | -0.639170 | 2.019270  |
| H  | -1.601020 | -0.306820 | 1.558960  |

|   |           |           |           |
|---|-----------|-----------|-----------|
| C | -2.065970 | 0.366860  | -0.948290 |
| H | -2.303550 | 0.100610  | -1.975860 |
| H | -2.246430 | 1.425890  | -0.775520 |
| H | -1.035740 | 0.114840  | -0.710340 |
| C | -4.377870 | -0.104530 | -0.340940 |
| H | -4.578360 | -0.371660 | -1.375790 |
| H | -5.004290 | -0.686160 | 0.331120  |
| H | -4.535510 | 0.959860  | -0.184410 |
| C | -2.700780 | -1.873050 | -0.251460 |
| H | -1.656780 | -2.067420 | -0.014930 |
| H | -3.359950 | -2.430510 | 0.410090  |
| H | -2.917110 | -2.110140 | -1.290730 |

**21-TS:**  $\Delta G = -2664443.35$  kJ/mol

|    |           |           |           |
|----|-----------|-----------|-----------|
| Si | 0.046009  | 0.132198  | 0.048629  |
| C  | 1.888088  | -0.075834 | 0.060109  |
| H  | 2.378857  | 0.891503  | -0.013779 |
| H  | 2.199341  | -0.567137 | 0.984800  |
| H  | 2.195023  | -0.706991 | -0.776978 |
| C  | -0.766809 | 0.875826  | 1.543344  |
| H  | -0.497602 | 1.926056  | 1.628498  |
| H  | -1.852397 | 0.785003  | 1.454108  |
| H  | -0.456847 | 0.345300  | 2.446518  |
| C  | -0.661588 | 0.732393  | -1.575884 |
| C  | 0.095042  | 1.432530  | -2.517622 |
| C  | -2.004955 | 0.477833  | -1.870258 |
| C  | -0.466910 | 1.860431  | -3.714449 |
| H  | 1.129826  | 1.666951  | -2.297846 |
| C  | -2.577916 | 0.911351  | -3.061083 |
| H  | -2.620651 | -0.065019 | -1.159745 |
| C  | -1.806448 | 1.603560  | -3.986919 |
| H  | 0.135977  | 2.403132  | -4.432722 |
| H  | -3.622080 | 0.709426  | -3.266258 |
| H  | -2.247081 | 1.942737  | -4.916357 |
| F  | 1.014499  | 2.827924  | 0.066814  |
| F  | -0.500416 | -1.420514 | 0.098027  |
| N  | -1.067672 | 5.129663  | -1.015844 |
| C  | 0.048938  | 4.940973  | -1.987733 |
| H  | -0.382305 | 4.666868  | -2.948082 |
| H  | 0.590347  | 5.881368  | -2.068260 |
| H  | 0.677568  | 4.141235  | -1.595544 |
| C  | -1.779463 | 3.828621  | -0.843816 |
| H  | -2.610034 | 3.984688  | -0.157975 |
| H  | -2.141685 | 3.504002  | -1.818423 |
| H  | -1.050385 | 3.122880  | -0.448122 |
| C  | -2.006535 | 6.166985  | -1.517044 |
| H  | -2.803922 | 6.292311  | -0.788316 |
| H  | -1.457495 | 7.097317  | -1.644099 |

|   |           |          |           |
|---|-----------|----------|-----------|
| H | -2.411569 | 5.831584 | -2.469227 |
| C | -0.500596 | 5.540751 | 0.301067  |
| H | 0.182053  | 4.749453 | 0.610158  |
| H | 0.017968  | 6.487860 | 0.169687  |
| H | -1.322626 | 5.655215 | 1.004462  |

25:  $\Delta G = -2664443.91$  kJ/mol

|    |           |           |           |
|----|-----------|-----------|-----------|
| Si | 2.540890  | -0.702520 | -0.215420 |
| C  | 2.948650  | -1.551470 | 1.378850  |
| H  | 2.039060  | -1.938170 | 1.843880  |
| H  | 3.619230  | -2.393250 | 1.196590  |
| H  | 3.429270  | -0.867910 | 2.080890  |
| C  | 1.777080  | -1.839530 | -1.465750 |
| H  | 2.465920  | -2.645700 | -1.725560 |
| H  | 0.867070  | -2.286440 | -1.059120 |
| H  | 1.514320  | -1.296750 | -2.376050 |
| C  | 1.487070  | 0.813320  | 0.060790  |
| C  | 0.837790  | 1.041120  | 1.277330  |
| C  | 1.290650  | 1.734930  | -0.974410 |
| C  | 0.013710  | 2.146580  | 1.454830  |
| H  | 0.966760  | 0.344550  | 2.098870  |
| C  | 0.477130  | 2.847620  | -0.800330 |
| H  | 1.778470  | 1.584990  | -1.932440 |
| C  | -0.166530 | 3.051730  | 0.415820  |
| H  | -0.487070 | 2.301680  | 2.402510  |
| H  | 0.339730  | 3.551440  | -1.611670 |
| H  | -0.806530 | 3.914540  | 0.552790  |
| F  | -0.978180 | -2.273460 | 1.509680  |
| F  | 3.928600  | -0.169010 | -0.867770 |
| N  | -3.026350 | -0.420240 | -0.283080 |
| C  | -3.075360 | -0.004890 | 1.149260  |
| H  | -2.772340 | 1.038520  | 1.210810  |
| H  | -4.097490 | -0.123990 | 1.502700  |
| H  | -2.385350 | -0.652080 | 1.690300  |
| C  | -1.625750 | -0.275210 | -0.778450 |
| H  | -1.596770 | -0.596390 | -1.817980 |
| H  | -1.343430 | 0.772510  | -0.694840 |
| H  | -1.000370 | -0.904150 | -0.145440 |
| C  | -3.940400 | 0.429830  | -1.090490 |
| H  | -3.882060 | 0.108700  | -2.127930 |
| H  | -4.951910 | 0.307860  | -0.710130 |
| H  | -3.620290 | 1.465140  | -0.994730 |
| C  | -3.430660 | -1.852060 | -0.387640 |
| H  | -2.725990 | -2.424730 | 0.214120  |
| H  | -4.446880 | -1.947400 | -0.011270 |
| H  | -3.386800 | -2.141220 | -1.435490 |

22:  $\Delta G = -3167753.60$  kJ/mol

|    |           |           |           |
|----|-----------|-----------|-----------|
| Si | 0.015490  | -1.757120 | -0.600040 |
| C  | 0.102820  | -2.906130 | -2.094570 |
| H  | 1.021650  | -2.709610 | -2.654450 |
| H  | 0.077550  | -3.962370 | -1.830810 |
| H  | -0.726380 | -2.690550 | -2.772970 |
| C  | -1.662600 | -1.200660 | 0.122620  |
| C  | -1.997030 | -1.422650 | 1.463730  |
| C  | -2.595480 | -0.499260 | -0.652440 |
| C  | -3.180810 | -0.941000 | 2.015260  |
| H  | -1.315250 | -1.980060 | 2.094610  |
| C  | -3.795070 | -0.038890 | -0.121550 |
| H  | -2.374870 | -0.301930 | -1.694700 |
| C  | -4.086190 | -0.247340 | 1.222050  |
| H  | -3.398590 | -1.112050 | 3.062800  |
| H  | -4.499330 | 0.490110  | -0.752720 |
| H  | -5.011750 | 0.123720  | 1.644890  |
| F  | 0.088690  | -3.084210 | 0.523550  |
| F  | -0.020930 | -0.371570 | -1.702720 |
| C  | 1.597290  | -1.014130 | 0.159360  |
| C  | 1.624310  | -0.541200 | 1.474700  |
| C  | 2.760320  | -0.848370 | -0.600150 |
| C  | 2.746520  | 0.089510  | 2.004170  |
| H  | 0.744840  | -0.651170 | 2.102460  |
| C  | 3.895910  | -0.238970 | -0.077090 |
| H  | 2.779900  | -1.188300 | -1.631150 |
| C  | 3.889330  | 0.241080  | 1.228250  |
| H  | 2.729430  | 0.461760  | 3.021840  |
| H  | 4.783720  | -0.130420 | -0.688940 |
| H  | 4.766500  | 0.728250  | 1.635980  |
| N  | 0.035260  | 2.939410  | -0.405100 |
| C  | -0.890370 | 2.756420  | -1.560690 |
| H  | -0.491890 | 3.310010  | -2.407830 |
| H  | -0.940100 | 1.692400  | -1.781500 |
| H  | -1.867690 | 3.142030  | -1.278200 |
| C  | -0.492980 | 2.184800  | 0.767080  |
| H  | -0.563690 | 1.135340  | 0.490590  |
| H  | 0.196220  | 2.315580  | 1.598630  |
| H  | -1.476060 | 2.580420  | 1.013960  |
| C  | 0.138920  | 4.385020  | -0.065200 |
| H  | 0.824650  | 4.491840  | 0.771820  |
| H  | 0.516100  | 4.915530  | -0.936220 |
| H  | -0.850860 | 4.746950  | 0.203170  |
| C  | 1.382790  | 2.407310  | -0.765550 |
| H  | 1.772560  | 2.999560  | -1.590400 |
| H  | 2.029150  | 2.491020  | 0.106230  |
| H  | 1.266000  | 1.365800  | -1.053290 |

**22-TS:**  $\Delta G = -3167691.78$  kJ/mol

|    |           |           |           |
|----|-----------|-----------|-----------|
| Si | 0.005938  | -0.040955 | 0.227381  |
| C  | 1.833752  | 0.056840  | 0.000897  |
| H  | 2.271326  | 0.785619  | 0.686202  |
| H  | 2.292943  | -0.915406 | 0.188047  |
| H  | 2.024287  | 0.365217  | -1.028184 |
| C  | -0.841348 | -1.377945 | -0.760658 |
| C  | -2.007207 | -1.977746 | -0.270102 |
| C  | -0.388031 | -1.753696 | -2.029078 |
| C  | -2.710515 | -2.906055 | -1.029176 |
| H  | -2.377984 | -1.716397 | 0.715455  |
| C  | -1.081487 | -2.690432 | -2.786452 |
| H  | 0.485766  | -1.262668 | -2.440075 |
| C  | -2.247759 | -3.262080 | -2.290684 |
| H  | -3.616127 | -3.352008 | -0.636968 |
| H  | -0.719170 | -2.966251 | -3.769493 |
| H  | -2.794593 | -3.983794 | -2.884972 |
| F  | -0.264360 | -0.489030 | 1.772677  |
| F  | 0.719618  | 0.987116  | -2.754632 |
| C  | -0.877631 | 1.597568  | 0.066431  |
| C  | -2.269537 | 1.661853  | 0.189100  |
| C  | -0.183834 | 2.788099  | -0.163060 |
| C  | -2.946975 | 2.871562  | 0.090027  |
| H  | -2.842010 | 0.754155  | 0.355630  |
| C  | -0.853457 | 4.001773  | -0.265124 |
| H  | 0.894160  | 2.767645  | -0.276160 |
| C  | -2.237322 | 4.044609  | -0.137128 |
| H  | -4.025812 | 2.898047  | 0.183437  |
| H  | -0.297693 | 4.913550  | -0.446206 |
| H  | -2.761573 | 4.988692  | -0.220185 |
| N  | -2.585218 | 1.248330  | -4.028374 |
| C  | -1.564714 | 0.483615  | -4.804638 |
| H  | -1.241707 | 1.106808  | -5.636395 |
| H  | -0.726398 | 0.282771  | -4.134925 |
| H  | -2.029134 | -0.428784 | -5.172674 |
| C  | -3.124198 | 0.384228  | -2.941230 |
| H  | -2.297971 | 0.090605  | -2.298495 |
| H  | -3.857892 | 0.957732  | -2.378744 |
| H  | -3.583692 | -0.492044 | -3.393838 |
| C  | -3.697323 | 1.667546  | -4.922650 |
| H  | -4.426265 | 2.216255  | -4.330849 |
| H  | -3.288926 | 2.301669  | -5.705792 |
| H  | -4.148645 | 0.776033  | -5.352230 |
| C  | -1.932210 | 2.448578  | -3.423386 |
| H  | -1.590856 | 3.087842  | -4.235663 |
| H  | -2.670579 | 2.966784  | -2.815396 |
| H  | -1.083224 | 2.099990  | -2.830856 |

26:  $\Delta G = -3167702.49$  kJ/mol

|    |           |           |           |
|----|-----------|-----------|-----------|
| Si | 2.444490  | 0.098980  | 0.312620  |
| C  | 2.993170  | 0.097560  | 2.076520  |
| H  | 3.625030  | -0.769050 | 2.278760  |
| H  | 3.556390  | 1.004540  | 2.302550  |
| H  | 2.133150  | 0.054810  | 2.748710  |
| C  | 1.387590  | 1.572390  | -0.112760 |
| C  | 1.188810  | 1.936650  | -1.449720 |
| C  | 0.681470  | 2.265390  | 0.874250  |
| C  | 0.306390  | 2.953550  | -1.790060 |
| H  | 1.722150  | 1.416720  | -2.238950 |
| C  | -0.209680 | 3.278380  | 0.538890  |
| H  | 0.813940  | 2.006280  | 1.919300  |
| C  | -0.400230 | 3.620580  | -0.794420 |
| H  | 0.163680  | 3.221910  | -2.829390 |
| H  | -0.755910 | 3.797910  | 1.316470  |
| H  | -1.096340 | 4.407000  | -1.058500 |
| F  | 3.736870  | 0.183120  | -0.656150 |
| F  | -1.508800 | -0.106830 | 2.844710  |
| C  | 1.526910  | -1.456230 | -0.147630 |
| C  | 1.354000  | -1.813780 | -1.489960 |
| C  | 0.886990  | -2.224930 | 0.829170  |
| C  | 0.561190  | -2.897730 | -1.845050 |
| H  | 1.838240  | -1.237480 | -2.271640 |
| C  | 0.083580  | -3.304170 | 0.479070  |
| H  | 1.001340  | -1.974350 | 1.878370  |
| C  | -0.082640 | -3.638870 | -0.859340 |
| H  | 0.437980  | -3.160650 | -2.888270 |
| H  | -0.413260 | -3.881240 | 1.249230  |
| H  | -0.710350 | -4.477320 | -1.134780 |
| N  | -3.039270 | -0.102700 | -0.086900 |
| C  | -3.430280 | 1.100490  | 0.703260  |
| H  | -4.507000 | 1.072220  | 0.857260  |
| H  | -2.888510 | 1.046650  | 1.647300  |
| H  | -3.150670 | 1.985310  | 0.134480  |
| C  | -1.561370 | -0.080050 | -0.291290 |
| H  | -1.106840 | -0.078170 | 0.698710  |
| H  | -1.278100 | -0.969590 | -0.852520 |
| H  | -1.306920 | 0.823450  | -0.843590 |
| C  | -3.736580 | -0.101090 | -1.399140 |
| H  | -3.431880 | -0.987230 | -1.951390 |
| H  | -4.809310 | -0.114350 | -1.220130 |
| H  | -3.451810 | 0.799630  | -1.938340 |
| C  | -3.398250 | -1.328110 | 0.683760  |
| H  | -4.475860 | -1.333190 | 0.834130  |
| H  | -3.092020 | -2.196140 | 0.102870  |
| H  | -2.862210 | -1.273260 | 1.630900  |



23:  $\Delta G = -3671016.13$  kJ/mol

|    |           |           |           |
|----|-----------|-----------|-----------|
| Si | 1.059980  | -0.071880 | 0.227190  |
| C  | 0.189280  | 1.626900  | 0.323660  |
| C  | -0.572340 | 1.988060  | 1.441870  |
| C  | 0.271110  | 2.559100  | -0.717260 |
| C  | -1.240150 | 3.206320  | 1.511340  |
| H  | -0.650700 | 1.295930  | 2.273410  |
| C  | -0.362470 | 3.795800  | -0.645010 |
| H  | 0.840390  | 2.310590  | -1.605710 |
| C  | -1.129600 | 4.119090  | 0.467960  |
| H  | -1.839190 | 3.447980  | 2.381170  |
| H  | -0.267880 | 4.502410  | -1.461060 |
| H  | -1.637870 | 5.074080  | 0.521840  |
| F  | 1.438630  | 0.044880  | 1.913170  |
| F  | 0.684090  | -0.149760 | -1.469520 |
| C  | 2.916440  | -0.198600 | -0.196260 |
| C  | 3.891300  | 0.450280  | 0.570210  |
| C  | 3.365460  | -0.942180 | -1.294640 |
| C  | 5.243740  | 0.377430  | 0.251440  |
| H  | 3.586060  | 1.026560  | 1.435570  |
| C  | 4.716770  | -1.047400 | -1.606490 |
| H  | 2.641640  | -1.450320 | -1.920940 |
| C  | 5.661850  | -0.379070 | -0.836710 |
| H  | 5.972140  | 0.905240  | 0.855710  |
| H  | 5.032500  | -1.643220 | -2.454690 |
| H  | 6.714460  | -0.447270 | -1.083090 |
| C  | 0.012010  | -1.643460 | 0.542210  |
| C  | -0.358140 | -2.507780 | -0.496430 |
| C  | -0.478650 | -1.950630 | 1.818800  |
| C  | -1.171740 | -3.615500 | -0.279060 |
| H  | -0.011340 | -2.303880 | -1.501580 |
| C  | -1.309740 | -3.042690 | 2.045470  |
| H  | -0.213780 | -1.313140 | 2.652640  |
| C  | -1.658810 | -3.882640 | 0.994720  |
| H  | -1.432790 | -4.265050 | -1.106280 |
| H  | -1.683210 | -3.239900 | 3.043360  |
| H  | -2.302960 | -4.736280 | 1.166700  |
| N  | -3.548050 | 0.182260  | -1.029810 |
| C  | -2.639400 | -0.411790 | -2.052700 |
| H  | -2.785250 | -1.489720 | -2.052340 |
| H  | -2.897150 | 0.009610  | -3.022090 |
| H  | -1.610580 | -0.170400 | -1.784920 |
| C  | -3.376130 | 1.663970  | -1.027570 |
| H  | -3.699730 | 2.046570  | -1.993050 |
| H  | -3.982150 | 2.081570  | -0.227100 |
| H  | -2.321780 | 1.879450  | -0.866430 |
| C  | -3.193450 | -0.355090 | 0.315490  |
| H  | -3.886350 | 0.059730  | 1.043950  |

|   |           |           |           |
|---|-----------|-----------|-----------|
| H | -3.262120 | -1.441510 | 0.286250  |
| H | -2.173760 | -0.053930 | 0.537110  |
| C | -4.961180 | -0.161530 | -1.348850 |
| H | -5.192140 | 0.219100  | -2.340840 |
| H | -5.064940 | -1.243720 | -1.321230 |
| H | -5.603120 | 0.302120  | -0.603450 |

**23-TS:**  $\Delta G = -3670937.78$  kJ/mol

|    |           |           |           |
|----|-----------|-----------|-----------|
| Si | 0.017033  | -0.090126 | -0.071379 |
| C  | 1.881630  | -0.057270 | -0.003476 |
| C  | 2.512479  | 1.189400  | 0.077813  |
| C  | 2.681963  | -1.199612 | -0.093734 |
| C  | 3.898514  | 1.296186  | 0.057267  |
| H  | 1.917847  | 2.094215  | 0.151871  |
| C  | 4.067460  | -1.098094 | -0.104817 |
| H  | 2.209039  | -2.166068 | -0.208193 |
| C  | 4.678063  | 0.149521  | -0.035278 |
| H  | 4.367951  | 2.270393  | 0.113890  |
| H  | 4.673625  | -1.992926 | -0.179699 |
| H  | 5.758232  | 0.227573  | -0.052606 |
| F  | -0.387997 | 1.122564  | 0.940389  |
| F  | 0.876065  | -2.481868 | -2.038044 |
| C  | -0.751345 | -1.630324 | 0.631859  |
| C  | -0.103222 | -2.341547 | 1.646980  |
| C  | -1.999653 | -2.086459 | 0.197681  |
| C  | -0.677645 | -3.477165 | 2.204980  |
| H  | 0.865202  | -2.010107 | 2.006313  |
| C  | -2.578349 | -3.221904 | 0.751824  |
| H  | -2.526057 | -1.554081 | -0.587008 |
| C  | -1.915489 | -3.920427 | 1.754269  |
| H  | -0.159244 | -4.017716 | 2.987162  |
| H  | -3.543978 | -3.563767 | 0.400616  |
| H  | -2.363119 | -4.807982 | 2.184043  |
| C  | -0.725056 | 0.505042  | -1.677852 |
| C  | -1.051616 | -0.337964 | -2.745384 |
| C  | -0.933009 | 1.881177  | -1.832419 |
| C  | -1.573376 | 0.178871  | -3.924637 |
| H  | -0.844314 | -1.397996 | -2.652347 |
| C  | -1.444743 | 2.401664  | -3.015665 |
| H  | -0.694903 | 2.558857  | -1.020402 |
| C  | -1.768260 | 1.549090  | -4.063597 |
| H  | -1.820332 | -0.487357 | -4.742547 |
| H  | -1.593589 | 3.469550  | -3.116745 |
| H  | -2.170343 | 1.950654  | -4.985600 |
| N  | 2.772460  | -0.990054 | -4.332018 |
| C  | 1.542864  | -1.553244 | -4.962062 |
| H  | 1.003882  | -0.737608 | -5.440042 |
| H  | 1.845302  | -2.293274 | -5.699807 |

|   |          |           |           |
|---|----------|-----------|-----------|
| H | 0.953913 | -2.000032 | -4.160939 |
| C | 3.515709 | -2.088077 | -3.647361 |
| H | 3.784614 | -2.833381 | -4.393039 |
| H | 4.409422 | -1.660755 | -3.196931 |
| H | 2.846634 | -2.496076 | -2.888916 |
| C | 2.361710 | 0.012705  | -3.307542 |
| H | 3.257603 | 0.395412  | -2.819635 |
| H | 1.820662 | 0.814317  | -3.808598 |
| H | 1.725782 | -0.513680 | -2.600014 |
| C | 3.631607 | -0.353341 | -5.363200 |
| H | 3.917675 | -1.110103 | -6.090124 |
| H | 3.062557 | 0.439361  | -5.843545 |
| H | 4.511984 | 0.055496  | -4.872695 |

**27:**  $\Delta G = -3670950.71$  kJ/mol

|    |           |           |           |
|----|-----------|-----------|-----------|
| Si | -1.535230 | 0.000520  | 1.028000  |
| C  | -0.498340 | -1.523800 | 0.783980  |
| C  | 0.159780  | -2.121650 | 1.863560  |
| C  | -0.243030 | -2.008930 | -0.502600 |
| C  | 1.051660  | -3.168760 | 1.663100  |
| H  | -0.016710 | -1.762500 | 2.871510  |
| C  | 0.653870  | -3.048820 | -0.708830 |
| H  | -0.735860 | -1.559720 | -1.359530 |
| C  | 1.303110  | -3.628820 | 0.375540  |
| H  | 1.554350  | -3.621070 | 2.508760  |
| H  | 0.848260  | -3.405420 | -1.712720 |
| H  | 2.004320  | -4.438700 | 0.216990  |
| F  | -1.984130 | 0.000900  | 2.578020  |
| F  | 1.666020  | -0.000210 | -3.043670 |
| C  | -3.045870 | 0.000710  | -0.051030 |
| C  | -3.646030 | -1.200980 | -0.442160 |
| C  | -3.646240 | 1.202530  | -0.441400 |
| C  | -4.810370 | -1.203230 | -1.199130 |
| H  | -3.198730 | -2.146770 | -0.155620 |
| C  | -4.810550 | 1.205060  | -1.198400 |
| H  | -3.199100 | 2.148220  | -0.154260 |
| C  | -5.392480 | 0.000980  | -1.577320 |
| H  | -5.262760 | -2.141380 | -1.494530 |
| H  | -5.263100 | 2.143320  | -1.493230 |
| H  | -6.299280 | 0.001090  | -2.169150 |
| C  | -0.497590 | 1.524270  | 0.783580  |
| C  | -0.242070 | 2.009060  | -0.503080 |
| C  | 0.160930  | 2.121910  | 1.863030  |
| C  | 0.655430  | 3.048400  | -0.709510 |
| H  | -0.735260 | 1.560040  | -1.359900 |
| C  | 1.053400  | 3.168460  | 1.662390  |
| H  | -0.015710 | 1.763000  | 2.871050  |
| C  | 1.305070  | 3.628170  | 0.374740  |

|   |          |           |           |
|---|----------|-----------|-----------|
| H | 0.849960 | 3.404760  | -1.713460 |
| H | 1.556390 | 3.620610  | 2.507950  |
| H | 2.006760 | 4.437610  | 0.216030  |
| N | 3.843450 | -0.000790 | -0.562810 |
| C | 4.013390 | 1.215420  | -1.409860 |
| H | 3.873260 | 2.089770  | -0.777090 |
| H | 5.018630 | 1.204490  | -1.825620 |
| H | 3.254900 | 1.164940  | -2.190950 |
| C | 4.013270 | -1.216440 | -1.410720 |
| H | 5.018480 | -1.205280 | -1.826530 |
| H | 3.873140 | -2.091210 | -0.778530 |
| H | 3.254720 | -1.165370 | -2.191710 |
| C | 2.461710 | -0.000940 | 0.000240  |
| H | 2.338430 | -0.897780 | 0.605850  |
| H | 2.338650 | 0.895140  | 0.607010  |
| H | 1.778050 | -0.000290 | -0.847030 |
| C | 4.841970 | -0.001240 | 0.537840  |
| H | 5.838150 | -0.001210 | 0.101740  |
| H | 4.690270 | 0.891830  | 1.139850  |
| H | 4.690090 | -0.894650 | 1.139290  |

## 5. References

1. Gaussian 16, Revision C.01, M. J. Frisch, G. W. Trucks, H. B. Schlegel, G. E. Scuseria, M. A. Robb, J. R. Cheeseman, G. Scalmani, V. Barone, G. A. Petersson, H. Nakatsuji, X. Li, M. Caricato, A. V. Marenich, J. Bloino, B. G. Janesko, R. Gomperts, B. Mennucci, H. P. Hratchian, J. V. Ortiz, A. F. Izmaylov, J. L. Sonnenberg, Williams, F. Ding, F. Lipparini, F. Egidi, J. Goings, B. Peng, A. Petrone, T. Henderson, D. Ranasinghe, V. G. Zakrzewski, J. Gao, N. Rega, G. Zheng, W. Liang, M. Hada, M. Ehara, K. Toyota, R. Fukuda, J. Hasegawa, M. Ishida, T. Nakajima, Y. Honda, O. Kitao, H. Nakai, T. Vreven, K. Throssell, J. A. Montgomery Jr., J. E. Peralta, F. Ogliaro, M. J. Bearpark, J. J. Heyd, E. N. Brothers, K. N. Kudin, V. N. Staroverov, T. A. Keith, R. Kobayashi, J. Normand, K. Raghavachari, A. P. Rendell, J. C. Burant, S. S. Iyengar, J. Tomasi, M. Cossi, J. M. Millam, M. Klene, C. Adamo, R. Cammi, J. W. Ochterski, R. L. Martin, K. Morokuma, O. Farkas, J. B. Foresman and D. J. Fox, *Gaussian, Inc.*, Wallingford CT, 2016.
2. Y. Zhao and D. G. Truhlar, *Theor. Chem. Acc.*, 2007, **120**, 215-241.
3. O. Vahtras, J. Almlöf and M. W. Feyereisen, *Chem. Phys. Lett.*, 1993, **213**, 514-518.
4. D. Rappoport and F. Furche, *J. Chem. Phys.*, 2010, **133**, 134105.
5. F. Weigend and R. Ahlrichs, *Phys. Chem. Chem. Phys.*, 2005, **7**, 3297-3305.
6. A. V. Marenich, C. J. Cramer and D. G. Truhlar, *J. Phys. Chem. B*, 2009, **113**, 6378-6396.
7. [S12] Bruker (2019). APEX4, SAINT. Bruker AXS Inc., Madison, Wisconsin, USA.
8. A. Altomare, G. Cascarano, G. Giacovazzo, A. Guagliardi, M. C. Burla, G. Polidori, M. Camalli, *J. Appl. Cryst.* **1994**, *27*, 435.
9. P. W. Betteridge, J. R. Carruthers, R. I. Cooper, K. Prout, D. J. Watkin, *J. Appl. Cryst.* **2003**, *36*, 1487.
